1 **Title**

2 **Towards increased shading potential: a combined phenotypic**  
3 **and genetic analysis of rice shoot architecture**

4

5 **Short title**

6 Analysis of variation in rice shoot architecture

7

8 **Authors**

9 Martina Huber<sup>1</sup>, Magdalena M. Julkowska<sup>2</sup>, Basten L. Snoek<sup>3</sup>, Hans van Veen<sup>1</sup>, Justine Toulotte<sup>1</sup>,  
10 Virender Kumar<sup>4</sup>, Kaisa Kajala<sup>1</sup>, Rashmi Sasidharan<sup>1</sup> and Ronald Pierik<sup>1\*</sup>

11

12 **Affiliations**

13 <sup>1</sup> *Plant Ecophysiology, Utrecht University, Padualaan 8, 3584 CH Utrecht, The Netherlands*

14 <sup>2</sup> *Boyce Thompson Institute, Ithaca, 14853, New York, USA*

15 <sup>3</sup> *Theoretical Biology and Bioinformatics, Utrecht University, Padualaan 8, 3584 CH Utrecht, The*  
16 *Netherlands*

17 <sup>4</sup> *Sustainable Impact Platform, International Rice Research Institute, DAPO Box 7777, Metro Manila,*  
18 *Philippines*

19 \* *Author for correspondence: Ronald Pierik, r.pierik@uu.nl*

20

21 **One sentence summary**

22 Through screening a rice diversity panel for variation in shoot architecture, we identified traits corresponding  
23 to plant shading potential and their genetic constituents.

24

## 25 **Author contributions**

26 M.H., R.P. and R.S. designed the experiments, with additional input from K.K., J.T. and H.v.V.; M.H.  
27 performed all experiments, analysed the data, and wrote the article with contributions of all authors; M.M.J.  
28 carried out the haplotype analysis and assisted with statistical data analysis and data visualization; B.S.  
29 provided technical assistance for the genome-wide association studies and performed part of the analysis;  
30 H.v.V. provided assistance for statistical analysis; J.T. performed part of the experiment and measurements;  
31 V.K. contributed to research plan and experiment support at IRRI; R.P. serves as the author responsible for  
32 contact and ensures communication, supervised all experiments, revised the manuscript draft and together with  
33 R.S. conceived the research plan and project design.

34

## 35 **Funding**

36 This research was funded by the Netherlands Organisation for Scientific Research (NWO) (Project Number  
37 14700.RS) in collaboration with The International Rice Research Institute.

38

## 39 **Abstract**

40 Rice feeds more than half of the world's human population. In modern rice farming, a major constraint for  
41 productivity is weed proliferation and the ecological impact of herbicide application. Increased weed  
42 competitiveness of commercial rice varieties requires enhanced shade casting to limit growth of shade-  
43 sensitive weeds and the need for herbicide. We aimed to identify traits that enhance rice shading capacity based  
44 on the canopy architecture and the underlying genetic components. We performed a phenotypic screen of a  
45 rice diversity panel comprised of 344 varieties, examining 13 canopy architecture traits linked with shading  
46 capacity in 4-week-old plants. The analysis revealed a vast range of phenotypic variation across the diversity  
47 panel. We used trait correlation and clustering to identify core traits that define shading capacity to be shoot  
48 area, number of leaves, culm and solidity (the compactness of the shoot). To simplify the complex canopy  
49 architecture, these traits were combined into a Shading Rank metric that is indicative of a plant's ability to cast  
50 shade. Genome wide association study (GWAS) revealed genetic loci underlying canopy architecture traits,  
51 out of which five loci were substantially contributing to shading potential. Subsequent haplotype analysis  
52 further explored allelic variation and identified seven haplotypes associated with increased shading.  
53 Identification of traits contributing to shading capacity and underlying allelic variation presented in this study  
54 will serve future genomic assisted breeding programmes. The investigated diversity panel, including widely  
55 grown varieties, shows that there is big potential and genetic resources for improvement of elite breeding lines.  
56 Implementing increased shading in rice breeding will make its farming less dependent on herbicides and  
57 contribute towards more environmentally sustainable agriculture.

58

## 59 Introduction

60 Rice feeds more than half of the world's population as a staple food (Kennedy and Burlingame, 2003; Wing et  
61 al., 2018). In traditional rice farming, seedlings are transplanted into flooded paddy fields. This works as a  
62 natural way to prevent weed infestation, since it gives rice seedlings a size advantage in addition to flood-  
63 suppressed germination and growth of weeds. This practice is increasingly problematic, both because of the  
64 high manual labour input (Kumar and Ladha 2011; Chakraborty et al. 2017) and because global climate change  
65 is reducing the availability of fresh water not only for rice farmers but for the global agricultural sector (FAO,  
66 2019; Oliver et al., 2019). Traditional rice farming system is transitioning towards direct-seeded rice, where  
67 rice seeds are directly sown into the fields. This practice drastically reduces the water requirement and labour  
68 input (Chauhan et al., 2017; Farooq et al., 2011; Kumar and Ladha, 2011). Besides all of its advantages, the  
69 major constraint for direct-seeded rice is abundant proliferation of weeds (Rao et al. 2017; Xu et al. 2019). In  
70 direct-seeded rice practice, rice seedlings are directly competing with weeds as they lose their seedling size  
71 advantage. Waterlogging cannot be applied to suppress emerging weeds, as most modern rice cultivars do not  
72 germinate under water (Chauhan, 2012; Ghosal et al., 2019; Kretschmar et al., 2015). Currently, weeds are  
73 suppressed with herbicides, leading to evolution of herbicide-resistant weeds and ground water pollution. This  
74 creates a pressing need for deployment of sustainable weed management options (Chauhan, 2012a; Chauhan  
75 and Yadav, 2013; Mennan et al., 2012; Zhao et al., 2006a). One possible solution to this problem is to increase  
76 weed-competitiveness of the rice seedling (Rao et al., 2007; Sakamoto et al., 2006; Zhao et al., 2007).

77 Just like their wild ancestors, shade casting crop varieties compete with invading weeds by reducing the weed's  
78 access to full sunlight, thereby impeding their growth. However, the traits contributing to shading potential  
79 were neglected or even selected against in breeding efforts, since tall plants and droopy leaves are generally  
80 considered as undesired, because it makes harvesting more difficult. Here we propose to develop weed-  
81 competitive rice varieties, by selecting for an ideotype with faster growth and high shade-casting potential on  
82 proximate weeds. Shoot architecture traits that help plants to gain advantage over their neighbours through  
83 light competition include: high number of leaves, increased tillering, large projected shoot area, increased  
84 planar angle of leaves and tillers (Andrew et al., 2015; Brainard et al., 2005; Mahajan and Chauhan, 2013;  
85 Seavers and Wright, 1999; Worthington and Reberg-Horton, 2013). Accelerated vertical growth might provide  
86 an additional advantage for outcompeting neighbours, yet plant height has been strongly selected against  
87 during green revolution of most cereals, including rice. Indeed, there exists great potential for weed  
88 suppression in cereal canopies, as has been shown for wheat, where a rapidly closing wheat crop canopy  
89 achieved through higher planting density, depleted weeds from access to light (Weiner et al., 2010).

90 Building on the idea to increase shading for improved weed competitiveness, here we examined the variation  
91 in rice shoot architecture, derived the traits that contribute to shading potential, and identified genetic loci  
92 associated with shading potential. The shading potential was defined here as high ground cover and early  
93 growth vigour. We determined key architectural characteristics of shading potential in the early growth phase.  
94 For this, (1) we phenotyped a rice diversity panel of 344 globally distributed varieties where we recorded 13

95 quantitative traits. Based on these, (2) we determined key architectural characteristics of shading potential in  
96 early growth phase. (3) We combined these core traits into one parameter to develop the Shading Rank, where  
97 all studied rice varieties were ranked for their shading potential. (4) Genome-wide association study (GWAS)  
98 revealed association with five genetic loci for traits contributing to shade potential. The results of this study  
99 form a primer to identification of alleles contributing to increased shading and early plant vigour.

100

## 101 **Results**

### 102 **Shoot architecture variation between rice varieties**

103 In order to establish the variation in shading potential, and resulting increased weed-competitiveness, within  
104 the rice diversity panel (Supplemental Table 1) we measured 13 traits on 4-week-old seedlings in the  
105 greenhouse (Figure 1, Table 1, Supplemental Table 2).

106 Substantial variation was observed for all measured traits among the varieties belonging to different  
107 subpopulations (Figure 1; Supplemental Table 2). The *indica* subpopulation showed highest dry weight,  
108 number of leaves, and number of tillers followed by *aus* subpopulation and *aromatic*, *tropical* and *temperate*  
109 *japonica* ranked lowest in these parameters (Supplemental Table 2). Shoot and hull area were also observed to  
110 be higher in *indica* and *aus* subpopulations, intermediate in *aromatic* subpopulation and lowest in *japonicas*  
111 and *admixture* subpopulations. *Indica* and *aus* on average develop the most compact shoots (highest solidity),  
112 contrasting with the low solidity of *japonicas* and *aromatic*. In plant height, *indica* lines and *temperate*  
113 *japonica* were shortest and *aromatic* subpopulation were tallest. When taking the entire diversity panel of 344  
114 varieties, five traits (shoot area, hull area, solidity, plant height and dry weight) already showed a significant  
115 difference between the individual varieties at four weeks after sowing (Supplemental Table 2). When grouped  
116 together in subpopulations, all traits showed significant differences between subpopulations (Supplemental  
117 Table 2). Overall, it appears that relatively large variation between subpopulations was observed for traits  
118 related to area and branchiness related traits, whereas traits related to height showed only little variation  
119 between subpopulations. These differences are clearly determined by differences in genetic background since  
120 the growth conditions were constant. The high variation observed for traits related to shading potential suggests  
121 that the investigated rice diversity panel has sufficient variation to improve shading of the elite-breeding  
122 varieties.

123

### 124 **Correlation of shoot architectural traits**

125 To explore the relationship between individually measured traits, and determine which traits are independent  
126 of each other, we performed a Pearson correlation analysis (Figure 2A, Supplemental Figure 1). Shoot area  
127 and hull area showed strong positive correlation with shoot dry weight. Leaf and tiller number were highly  
128 correlated with dry weight. Height-associated traits, such as plant height, culm height and leaf length, were

129 positively correlated with each other. On the other hand, a negative correlation was found between culm height  
130 and number of leaves and tillers. Solidity, leaf angle, tiller angle and droopiness did not exhibit strong  
131 correlation with other measured traits.

132 To examine the types of canopy architecture exhibited within rice diversity panel, we performed hierarchical  
133 clustering (Figure 2B), resulting in seven trait clusters. The clustering shows how traits are grouped together  
134 according to the patterns observed across all rice varieties. Taking the correlation and clustering analyses  
135 together, we can determine core groups of traits: area-related (shoot area, hull area, perimeter), branchiness  
136 (number of leaves and tillers and dry weight), height-related (plant and culm height and leaf length), solidity,  
137 leaf angle, tiller angle and droopiness (Table 2).

138

### 139 **Defining “shading potential”**

140 The shading potential of a plant determines the effectiveness with which it can cover ground area. The shading  
141 potential increases with an increasing number of leaves and tillers (branchiness), the size of the leaf and tiller  
142 angles, and the shoot area. Additionally, the shading potential accounts for plant height, as it offers competitive  
143 advantage to shading shorter weed plants. Therefore, plants with an increased height, number of leaves and  
144 wider angles are considered more vigorous, and thus likely to outcompete weeds for sunlight by casting more  
145 shade. With the aim of finding the ideal plant with highest shading potential for effective weed competition,  
146 we need to determine varieties with high values for core traits. The distribution of the different varieties with  
147 respect to the core trait groups: area, branchiness, height and solidity are shown in Figure 3, together with top  
148 images of representative varieties.

149 To quantify shading potential, we ranked varieties for the sum of the core traits contributing to shading potential  
150 (projected shoot area, number of leaves, solidity, culm height, leaf angle, tiller angle and leaf droopiness, bold  
151 in Table 2). To account for the differences in measured units and unit ranges, for each trait, the values were  
152 rescaled to a range from 0 to 100, whilst keeping the relative differences of trait-values between different  
153 varieties unchanged and these relative differences of trait values are also reflected in the sum of the normalized  
154 trait values. Varieties then were ranked according to their sum of normalized trait values, from 344 (highest)  
155 to 1 (lowest), resulting in the Shading Rank (for detailed information see Methods section - Data processing  
156 and statistical analysis).

157 The Shading Rank gives a quantitative measure of the shading potential for a certain variety and indicates  
158 where a specific variety ranks with respect to the entire diversity panel (Supplemental Table 3). Although this  
159 ranking allows insight into the distribution of shading potential and the identification of expected strong and  
160 weak shaders, a limitation of this ranking is that it applies only within the diversity panel tested. Shoot size is  
161 one of the major factors contributing to overall shading potential. Since the diversity panel was evaluated 28  
162 days after sowing, the large shoot size of high-ranking varieties also indicates faster growth and seedling  
163 vigour. The varieties with the highest Shading Rank were Shim Balte, Sze Guen Zim, Paraiba Chines Nova, P

164 737, Shirkati and Sabharaj, while varieties with lowest Shading Rank were Luk Takhar, Guineandao, Bul Zo  
165 and Shirogane. From the 25 highest ranking varieties, 14 belong to the *indica subpopulation* and eight to *aus*.  
166 Low scoring varieties in terms of shading potential include widely-grown varieties such as IR 64 and  
167 Nipponbare, ranking 74<sup>th</sup> and 73<sup>rd</sup> respectively (Table 3, Figure 3). This suggests that some of the current elite  
168 rice varieties could have a rather poor shading potential, and through breeding with varieties from *indica* and  
169 *aus* subpopulations, the shading potential and weed-competitiveness can possibly be increased.

170 Interestingly, none of the top-ranking varieties showed the highest values for all core shading traits (Figure 3).  
171 For example, Sze Guen Zim ranks highest for shoot area and number of leaves, but is one of the lower-ranking  
172 varieties for culm height. The accession with the highest Shade Ranking (344), Shim Balte has a very high  
173 number of leaves and solidity, but has a close to average culm height. Mudgo reaches a rank of 340, despite  
174 its relatively low number of leaves and solidity. Della, a variety with a low rank of 49, ranks low for all traits  
175 except for culm height. Luk Takhar is at the bottom end of the ranking and shows low values for all core traits.  
176 The core traits that determine shading potential: shoot area, number of leaves, solidity and culm height are  
177 only weakly correlated (Figure 2, Figure 3), illustrating the diverse strategies to reach high shading potential.  
178 It is therefore important to include all of the four core traits, in addition to the angle related traits, for a  
179 comprehensive evaluation of shading potential.

180

### 181 **Predicted competitive varieties are casting more shade**

182 To validate our Shading Rank and assess functional shading capacity, we grew varieties with varying Shading  
183 Rank and evaluated them for canopy shading. We selected two of the predicted competitive (Shim Balte with  
184 a Shading Rank of 344 and Mudgo ranking 330) and two predicted non-competitive rice varieties (Luk Takhar  
185 ranking 1 and Della ranking 49) (Figure 3, Table 3). By measuring the light quantity under the canopies of  
186 selected varieties (Supplemental Table 4), we indeed observed strong shading by varieties with a high Shading  
187 Rank (Shim Balte and Mudgo) and low shading by varieties with a low Shading Rank (Luk Takhar and Della).  
188 This result validates our Shading Rank, at least for the varieties tested and the selection of shoot architecture  
189 traits to effectively predict shade casting.



## 190 **SNPs associated with seedling establishment and shoot architectural traits**

191 The high phenotypic variability found in the studied diversity panel (Supplemental Table 5), together with the  
192 high genetic variation (Wang et al., 2018b) provides a strong basis for a GWAS. We observed high narrow-  
193 sense heritability for all measured traits (Supplemental Table 6). We investigated the genomic trait associations  
194 on two different SNP sets, both with two different software packages (lme4QTL (Ziyatdinov et al., 2018) and  
195 Genomic Association and Prediction Integrated Tool (GAPIT) (Tang et al., 2016; Wang et al., 2018c), see  
196 methods for detailed description). The total list of p-values for SNPs association across all measured traits can  
197 be found at <https://doi.org/10.5281/zenodo.4730232> (Supplemental Data 3).

198 Three genomic regions were associated with plant height located on chromosome 3, 5 and 6 (Figure 5). The  
199 peak on chromosome 3 was also detected for other height related traits: culm height and leaf length  
200 (Supplemental Data 4). Overall, the associations with culm height showed lower LOD scores (Supplemental  
201 Data 4). The results for tiller angle and droopiness reveal strong associations with SNPs on chromosome 1 and  
202 chromosomes 1 and 10, respectively (Supplemental Data 4). Despite solidity being a very complex and likely  
203 a poly-genic trait, the analysis revealed a strong association with 14 SNPs in the locus on chromosome 3  
204 (Figure 5). The associations between leaf or tiller number, found for SNPs on chromosomes 11 and 12, were  
205 shared between these two traits (Supplemental Data 4). These two loci were also found for dry weight. This  
206 suggests that the genetic components underlying formation of new leaves and tillers might have a common  
207 genetic constituent, consistent with high correlation in their phenotypes (Figure 2). The analysis for dry weight  
208 revealed significant associations on chromosomes 3, 7 and 12, overlapping with the associations found for  
209 shoot area (Figure 5). When taking together shading potential as the sum of all core traits, a GWAS on this  
210 composite trait yielded a rather random pattern of SNP associations (Supplement Figure 4). This further  
211 highlights our earlier findings (Figure 4), that shading can be achieved through various strategies and shading  
212 potential, as such, is genetically a highly complex trait. Therefore, genetic mapping of shoot architecture  
213 components that contribute to shading capacity is much more effective approach in identifying genetic  
214 components that contribute to shading and potential weed competitiveness.

215

## 216 **Identification of alleles associated with increased shading potential**

217 The genomic regions that consisted of multiple SNPs above the Bonferroni threshold within the calculated  
218 local average LD (Table 5) were investigated in more detail. Since the traits related to the canopy shading  
219 potential are the primary focus of this work, we prioritized the loci associated with culm height, shoot area,  
220 solidity and dry weight. Locus 4 of shoot area overlaps with locus 5 detected for dry weight (Figure 5, Table  
221 5) and was therefore taken together in the follow up analysis. In total we determined five loci to be followed  
222 up with a haplotype analysis to identify specific alleles which could contribute to shading potential. By  
223 grouping varieties according to SNPs within one coding region, and examining the differences between  
224 identified haplotypes, we identified allelic variation associated with high shading potential (Figure 6, Table 6).



225 The haplotypes of two coding regions in locus 1 (Figure 6 A- B), associated with solidity, were observed to  
226 have significantly lower solidity than the most abundant haplotype identified for the respective coding regions.  
227 These are annotated as Os03g0845000 (Pirin-like protein) and Os03g0845700 (similar to RPB17 fragment).  
228 Haplotypes of two coding regions in locus 2 (Figure 6 C-D), associated with plant height, Os05g0420600  
229 (Cytochrome C) and Os05g0420900 (conserved hypothetical protein), contained taller plants than the most  
230 abundant haplotype. In locus 4, associated with shoot area and dry weight, we found that only one gene  
231 (Os07g0623200, ATPase and heavy metal transporter protein) showed clear separation across the haplotypes,  
232 where all the non-reference haplotypes showed higher shading potential, indicated by higher shoot area and  
233 dry weight (Figure 6 E-F). For locus 6, associated with dry weight, we found only one gene Os11g0216000  
234 encoding Pyruvate kinase family protein, we found that the second most abundant haplotype was associated  
235 with increased shading due to higher dry weight of varieties that were sharing this specific combination of  
236 SNPs.

237

## 238 Discussion

239 We studied phenotypic and genetic variation in rice shoot architecture to identify traits and their underlying  
240 genetic loci that contribute to canopy shading. We investigated variability across a natural rice diversity panel  
241 in shoot architecture at the early vegetative stage. The traits investigated here encompass both early vigour and  
242 shade casting through shoot architecture, which are hypothesized to contribute to weed suppression in rice  
243 fields. Traits related to shoot architecture, such as leaf angle or droopiness, are of special interest as they do  
244 not require substantial resource investment while creating more optimal 3D distribution of the shoot biomass  
245 for an increased shading potential. Other traits, such as leaf area, number of leaves or shoot biomass, likely  
246 require considerable resource investments and are typically associated with growth vigour i.e. rapid seedling  
247 establishment.

248 In our screen for variation in shoot architecture traits we found significant differences between subpopulations,  
249 where varieties with an *indica* background have highest shading potential and *temperate japonica* the least.  
250 We found *admixed*, *tropical japonica* and *aus* subpopulations to typically range between *temperate japonica*  
251 and *indica*. This pattern could be found in the majority of the measured traits and is in line with the phylogenetic  
252 relatedness of the different subpopulations (Eizenga et al., 2014; Liakat Ali et al., 2011; McCouch et al., 2016;  
253 Zhao et al., 2011). This indicates that phylogenetic relatedness is an important component that determines  
254 phenotypic variation in shoot architecture and shading potential.

255

## 256 Identification of core shading traits through correlation analysis

257 In order to summarize the information contained in all the investigated traits into one parameter indicative for  
258 the shading potential, we performed an extensive correlation analysis. By assessing the correlation between

259 individual traits, we identified how all measured traits are related to one another and identified core traits that  
260 capture the observed variance (Figure 2). We identified groups of traits related to branchiness (number of  
261 leaves and tillers) and height (plant height, culm height and leaf length). The correlations between traits  
262 encapsulated within a trait group simply underlines the natural growth pattern; the more tillers a plant has, the  
263 more leaves it will have since each tiller will develop a certain number of leaves. Strong correlation was  
264 previously observed between tiller formation and relative growth rate (Dingkuhn et al., 2001). Likewise, in  
265 our study number of leaves and leaf area were positively correlated with shoot dry weight (Figure 2,  
266 Supplemental Figure 1). This well-established relationship (Caton et al., 2003; Dingkuhn et al., 2001; Poorter  
267 et al., 2012) can be explained due to a larger shoot area providing higher capacity for photosynthesis and  
268 thereby leading to higher overall growth rate (Caton et al., 2003). Not all traits showed expected correlations.  
269 It could for example be assumed that an increased inclination angle of the leaf blade would make a leaf  
270 droopier. In fact, leaf angle appeared to be unrelated to leaf droopiness, whereas leaf length appeared to be  
271 positively correlated with droopiness. While solidity is the ratio of shoot area and hull area, it is only weakly  
272 correlated with shoot area (Figure 2, Supplemental Figure 1). This suggests that shoot solidity is independent  
273 of how large its total shoot area, leaf number or dry weight are. Since solidity indicates the uniformity of the  
274 plant's ability to shade its circumference, it is a valuable trait for shading capacity analysis. Inverse correlations  
275 were found between branchiness (number of leaves and tillers) and height traits. This trade-off between height  
276 and branching is well-documented as apical dominance where height growth of the main shoot is promoted at  
277 the expense of branching (Roig-Villanova and Martínez-García, 2016; Teichmann and Muhr, 2015).  
278 Summarizing, the trends observed within this study are in line with earlier observations, whereas we identify  
279 new, informative trait groups that contribute independently to the shading potential of rice plants.

280

### 281 **Shading rank as a measure for shading potential**

282 Shading potential can be defined in two-dimensional measures, such as ground cover or projected shoot area,  
283 or including a third dimension, where plant height is considered as space resource utilization (Zhang et al.,  
284 2019). We hypothesized that not only projected shoot area, but also solidity and height of the shoot are crucial  
285 for shading potential. For example, a large projected shoot area with low solidity would still leave many open  
286 spaces within a single plant's sphere for light penetration where weeds can proliferate. Or the reverse, a very  
287 solid projected shoot area of one plant that does not extend very far, is likely to leave open spaces between  
288 crop plants where weeds could grow. It is, therefore, clear that an optimal combination of shoot architecture  
289 traits is needed for maximal shading and weed suppression (Figure 3, Table 3). Architecture traits that are  
290 associated with weed-competitiveness include leaf area, ground cover, specific leaf area, leaf area index, leaf  
291 angle, droopiness, tillering capacity and plant height (Caton et al., 2003; Dingkuhn et al., 2001; Haefele et al.,  
292 2004; Mahajan and Chauhan, 2013; Mennan et al., 2012; Namuco et al., 2009; Rao et al., 2007; Worthington  
293 and Reberg-Horton, 2013; Zhao et al., 2006b, 2007). In addition, plant biomass and early vigour are  
294 advantageous for competition against weeds (Haefele et al., 2004; Mahajan and Chauhan, 2013; Namuco et

295 al., 2009; Worthington and Reberg-Horton, 2013; Zhao et al., 2006a), but these are not specific architecture  
296 traits.

297 To predict which components best describe a plant's shading potential, we categorized the different traits into  
298 core groups of similarly behaving traits. We developed the Shading Rank, as a parameter that combines  
299 branchiness, solidity and height and leaf and tiller angles and droopiness. The varieties with highest shading  
300 potential belong to the *indica* and *aus* subpopulation, which have also been found in earlier studies to have  
301 higher yield and less weed biomass in weedy fields compared to *japonicas* (Zhao et al., 2006b). We propose  
302 that varieties that have a high Shading Rank, are likely the most weed-competitive varieties, whereas those  
303 that rank low are likely to be weak competitors. Indeed, our experiment proved that canopies of high-ranking  
304 varieties allow significantly less light penetration than low ranking ones (Figure 4). Interestingly, none of the  
305 investigated varieties resembled the full ideotype of a strongly shading plant according to the traits we  
306 examined (Figure 3), indicating there is substantial room for improvement. Early seedling vigour is particularly  
307 important for weed-competition during the critical period of weed control and some of high ranking varieties,  
308 such as Shim Balte, Paung Malaung and Sabharaj are also known by breeders for their early vigour. Increased  
309 shading ability is intrinsic to early vigour since it follows to some extent from large size. However, the Shading  
310 Rank proposed here is more comprehensive to additional traits such as solidity and plant architecture that may  
311 involve less resource investment than vigour traits. With this improved way of ranking a plant's shading  
312 capacity, our study exemplifies a new method of selection for high-shading varieties and genetic loci associated  
313 with high-shade canopy architecture.

314

## 315 **Elucidating the genetic components of shading potential**

### 316 *Architecture*

317 The SNP dataset from the rice diversity panel (Eizenga et al., 2014) was combined with the observed  
318 phenotypic variation to identify putative genetic loci underlying high shading potential. This variation (Figure  
319 1, Supplemental Table 5) together with a high trait heritability (Supplemental Table 6) provides a strong basis  
320 for GWAS. Plant height and leaf length were associated with loci on chromosomes 5 and 6. The locus on  
321 chromosome 5 harbours two genes encoding Cytochrome C and a conserved hypothetical protein. The  
322 haplotype analysis revealed one allele for both genes that was associated with a highly significant increase in  
323 plant height. (Figure 4). The locus on chromosome 6 encodes the *Heading Date (Hd1)* locus that was also  
324 previously associated with plant height in vegetative rice plants (Zhang et al., 2012; Yang et al., 2014). Subedi  
325 et al. (2019) performed a GWAS on plant height at plant maturity and found peaks on chromosome 1 and 11,  
326 which could indicate that at different developmental stages plant height is determined by different genomic  
327 regions. However, Subedi et al (2019) used a specifically constructed genetic population stemming from six  
328 parents and this could explain why very different loci were identified. Interestingly, haplotypes associated with  
329 high culm height exhibit low plant height and vice versa (Supplemental Data 7). Haplotypes associated with  
330 high plant height are typically showing longer leaf length (Supplemental Data 7). While all the height related

331 traits were highly correlated at phenotypic level (Figure 2), the lack of common loci for all the traits  
332 (Supplemental Data 4), and opposite trends within the haplotype groups (Supplemental Data 7) suggest that  
333 the three components of plant height are regulated independently at the genetic level.

334 We also report unique loci specific for solidity and for height related traits. We revealed one strong locus, with  
335 several significant SNP associations, on chromosome 3 for solidity (Figure 5). We propose that solidity, as  
336 mentioned previously, is an important shoot trait to take into consideration for weed-competitiveness, since  
337 high crop plant solidity likely indicates low potential for weeds to proliferate within the sphere of influence of  
338 crop individuals. It is surprising to find a single locus, uniquely associated with this complex trait. However,  
339 when we grouped varieties into haplotype groups for two coding regions (Os03g0845000 and Os03g0845700,  
340 Figure 6 A – B), encoding a Pirin-like protein and an RPB17 (Fragment) within this locus, the phenotype of  
341 the haplotype groups appeared to differ not just in solidity, but also shoot area, dry weight and leaf number  
342 (Figure 6 A-B, Supplemental Data 7).

343 In this analysis, we identified new genetic components of shading potential based on shoot architecture, and  
344 the alleles that might contribute to increased shade casting ability.

#### 345 ***Vigour***

346 Vigour-related traits (i.e., dry weight, shoot area, number of leaves) are all strongly correlated and share  
347 associated loci on chromosome 7, 11 and 12 (Figure 5, Supplemental Data 4). The locus on chromosome 11  
348 was also reported by (Yang et al., 2014) for dry weight and fresh weight at the late tillering stage, which is  
349 comparable to the developmental stage studied here. A closer look at the locus found for dry weight on  
350 chromosome 11 revealed only one gene is located within the linkage disequilibrium of associated SNPs.  
351 Interestingly, the haplotype analysis for SNPs within Os11g021600, encoding a Pyruvate kinase family protein,  
352 revealed significant difference in dry weight between the two haplotype groups (Figure 6 G). The significant  
353 differences were also observed for shoot area and number of leaves and tillers. As only one gene was located  
354 within this locus and one specific haplotype was related with high biomass, this locus is a promising candidate  
355 for follow-up studies and promising to be included in breeding programmes. The locus on chromosome 7  
356 associated with shoot area and dry weight (Figure 6 E and F), harbours two genes, where we found that the  
357 haplotypes were associated with an increased shoot area and dry weight but also increased number of leaves  
358 and tillers. QTLs for height at 7 and 14 days after sowing and fresh weight, in a study that involved exclusively  
359 *temperate japonica* genotypes (Cordero-Lara et al., 2016) were entirely non-overlapping with the loci  
360 identified here for these traits. This is most likely because of the different genetic make-up of the populations  
361 used, which inevitably leads to variation. Even though the GWAS results for number of leaves and dry weight  
362 revealed different genetic associations for each of these traits, the identified haplotypes affected both these  
363 traits in a similar way. The haplotypes associated with high projected shoot area also showed increased  
364 branchiness and dry weight (Supplemental Data 4). This might suggest that by selecting for a genetic locus  
365 associated with branchiness, the other traits contributing to shading potential might also be affected. This

366 relationship is to be further studied in future reverse-genetic studies that could explore the role of identified  
367 candidate loci in increased shading potential as well as weed-competitiveness.

368 It should be kept in mind that rice is known to be a highly plastic species and we have performed our  
369 experiments under stable conditions in a controlled environment. In order to further translate our findings, and  
370 implement them in breeding programmes, it will be relevant to factor in architectural plasticity under field  
371 conditions. One obvious factor affecting architecture would be planting density and the associated changes in  
372 light composition and availability. Another so far neglected aspect of weed-competitiveness would be the root  
373 systems, for which the rapidly evolving high throughput phenotyping methods are a major opportunity to  
374 resolve comparable questions as done here for shoot architecture. We conclude that breeding for specific vigour  
375 traits will likely have additional beneficial effects, as indicated by the haplotype studies. Vigour from root  
376 growth can then be an added layer at a later step towards field-grown, weed-competitive varieties that can be  
377 farmed in a sustainable manner.

378

## 379 **Conclusion**

380 This study explored diversity in shoot architecture of rice seedlings, identified traits contributing to canopy  
381 shading potential and identified the putative genetic components related to canopy shading. The traits  
382 contributing to a high Shading Rank, and therefore a proposed increased weed-competitiveness, are also  
383 intrinsically relevant for seedling vigour. Shoot area, number of leaves and plant height contribute strongly to  
384 early vigour and are therefore imperative target traits for weed-competitiveness. We also highlight additional  
385 shoot architecture traits, such as solidity and leaf angles, that contribute to increased shading potential and are  
386 therefore desirable traits for weed-competitiveness (Figure 2). Indeed, we confirmed that light extinction is  
387 significantly stronger under canopies of varieties predicted to have high shading potential and therefore likely  
388 being more weed-competitive.

389 We identified 26 significant marker-trait associations including five novel loci related to canopy shading traits,  
390 and the haplotypes corresponding to high-shading potential. Phenotypic investigations carried out in previous  
391 studies focused on adult plants and yield traits. This is also reflected in the breeding programme over the last  
392 decades, which aimed for high yielding dwarf varieties. Many widely cultivated varieties, such as IR 64 and  
393 Nipponbare, showed low Shading Ranks in our analyses, and the most abundant haplotypes, with only few  
394 exceptions, were often the ones with lowest shade casting. Our study indicates a clear potential for  
395 improvement towards sustainable weed suppression in the current breeding programmes, and that some of the  
396 newly studied traits here could be introduced into future breeding programmes.

397 Summarizing, the acquired knowledge of relevant traits, together with the information about their underlying  
398 genomic regions and haplotypes described here can serve as a basis for future reverse-genetic studies and  
399 genome-assisted breeding programmes that will contribute to making rice farming more sustainable and help  
400 to improve yield in dry, direct-seeded rice.

## 401 **Material and methods**

402

### 403 **Plant material**

404 344 Asian rice (*O. sativa*) cultivars were used out of an established rice diversity panel (Rice diversity panel  
405 1; RDP1 (Eizenga et al., 2014)). In addition, one African rice variety (*O. glaberrima*) TOG7192 was also  
406 included. The RDP1 is a collection of purified, homozygous rice varieties spread over 82 countries all over the  
407 world. The panel includes landraces and elite rice cultivars from five subpopulations: *indica* and *aus* belonging  
408 to the Indica varietal group and *tropical japonica*, *temperate japonica* and *aromatic* which comprise the  
409 Japonica varietal group, in addition to the *admixture* group, (Liakat Ali et al., 2011; Zhao et al., 2011). The full  
410 panel and detailed information (accession name, accession ID, subpopulation and country of origin) can be  
411 found in the Supplemental Table 1.

### 412 **Growth conditions**

413 Rice plants were grown in the screen-house facilities of the International Rice Research Institute (IRRI) in The  
414 Philippines, during October 2017 – April 2018. Temperatures ranged from 37 °C during the day to 27 °C during  
415 the night, with a relative humidity of 75 % and 80 %, respectively and a photoperiod ranging from 11 to 12  
416 hours. Four temporally separated replications were carried out, with three plants per variety within each  
417 replicated experiment. Plants were grown in a randomized block design in single pots with a 30 cm x 30 cm  
418 distance between seedlings. In the first experiment, seeds received from the gene bank at IRRI were exposed  
419 to 40 °C for up to 5 days, to break dormancy, followed by 24 h at 21 °C. For germination, seeds were put in  
420 Petri dishes (12 per variety) on wet filter paper and incubated at 32 °C for 24 h. Seeds were planted directly  
421 on the soil, following the direct-seeded rice method: 4 seeds were placed per pot (diameter of 16 cm and 13  
422 cm high, without drainage holes on the bottom) filled with sterilized clay-loam field soil mixed with complete  
423 fertilizer (NPK fertilizer with 46 / 18 / 60 g per kg soil). The seeds were sown at a depth of x-cm and then  
424 covered with a thin layer of soil. From planting onwards, soil was kept moist. At 7 days after sowing (DAS),  
425 surplus seedlings were removed to retain only 1 seedling per pot. At 14 DAS, fertilizer was added, with 50%  
426 of N of concentration off first application. From 15 DAS until the end of the experiment, watering was done  
427 to keep a layer of water on the soil and the plants under water-logged conditions.

### 428 **Phenotyping**

429 Plants were measured by hand at 28 DAS for the following traits: number of leaves, number of tillers, total  
430 plant height, culm height, and length of longest leaf. Plants were photographed from the top and side using 2  
431 digital cameras in a fixed imaging set-up at 21 and 28 DAS. At the last time point, a scan of the blade of the  
432 longest leaf was taken and the whole shoot was harvested for analysis of dry weight upon 48 h of drying at  
433 70 °C (IRRI, 2013; Caton et al., 2003). In Table 1, each trait, their abbreviations and evaluation methods are  
434 described. The raw data for each replicate can be accessed at <https://doi.org/10.5281/zenodo.4730232>  
435 (Supplemental Data 1).



## 436 Data processing and statistical analysis

437 In order to extract traits from RGB images, an automatised image analysis pipeline was established using the  
438 open source, python based PlantCV software (PlantCV version 3.7) (Fahlgren et al., 2015; Gehan et al., 2017).  
439 We made optimisations to the script for detection of monocots, to enable the extraction of values for shoot  
440 area, hull area and perimeter. The python script describing the developed pipeline can be accessed at  
441 <https://plantcv.readthedocs.io/en/stable/> and the adapted Jupiter notebook used for processing all the images  
442 at <https://doi.org/10.5281/zenodo.4730232> (Supplemental Data 2). The measurements of tiller angle, leaf angle  
443 and leaf erectness, were done using the free ImageJ software (<https://imagej.nih.gov/ij/>). Tiller angles were  
444 taken between the two outermost tillers and the culm, respectively. The leaf angles were taken between the  
445 second and third youngest leaf and the culm, respectively. The leaf droopiness was measured on the same  
446 leaves as the interception angle of two tangents aligned to the initiation and the tip of the leaf blade.

447 The values of the first replicate were excluded for 62 varieties as their position within the greenhouse was  
448 more shaded. These positions were excluded from further experimental replication, to ensure equal light  
449 conditions for all studied plants. Prior to statistical analysis, the raw data was curated for outliers (using  
450  $1.5 \times \text{IQR}$  away from the mean) and mean was calculated out of the four replicates, with two biological  
451 replicates each. Statistical analysis such as ANOVA, Pearson Correlation and Hierarchical Clustering were  
452 performed using R (R Version: 3.6.1-1bionic; R Core Team, 2020) and the online tool MVapp  
453 <https://mvapp.kaust.edu.sa> (Julkowska et al., 2019). The Pearson Correlation coefficients between traits were  
454 calculated using raw data. For Hierarchical Clustering traits and individual samples were clustered using  
455 ward.D2 method. The values of individual traits were normalized per trait using z-Fisher transformation and  
456 scaled prior to clustering. Based on the correlation and clustering analysis, a subset of phenotypic traits, was  
457 defined as the core traits. The core traits were shoot area, leaf number, solidity, culm height, leaf angle, tiller  
458 angle and leaf droopiness. Then we calculated the Shading Rank as follows:

459 First, we normalized the trait values  $t_{\text{variety}}^n$

$$460 \quad t_{\text{variety}}^n = \frac{t_{\text{variety}} - \min(t_{\text{variety}})}{\max(t_{\text{variety}}) - \min(t_{\text{variety}})} \times 100$$

461 where  $t_{\text{variety}}$  is the value of a certain trait measured for a certain plant in the investigated population and min  
462 and max are the minimum and maximum values of the measured trait in the whole population, with the  
463 normalized values ranging from 0 to 100.

464 Next, we calculated the Shading Score for each variety  $SS_{\text{variety}}$

465  $SS_{\text{variety}} = \sum_{\text{core traits}} t_{\text{variety}}^n$  where  $\sum$  is calculated as the sum only from the normalized values of the core  
466 traits. From this, we get the Shading Rank (SR), which is the rank given to each variety according to its SS,  
467 ordering the varieties from 1 (lowest) to 344 (highest). The list of 344 varieties with their normalized core trait  
468 values, the sum of normalized core trait values and their Shading Rank can be found in Supplemental Table 3.



## 469 **Canopy shading experiment**

470 Rice were grown in the greenhouse facilities of Utrecht University, in The Netherlands, in February 2021.  
471 Temperatures were set to 29 °C during the day and 25 °C during the night and a photoperiod from 8 am to 8  
472 pm, with a minimal light intensity of 400  $\mu\text{mol m}^{-2} \text{s}^{-1}$  and artificial light (Valoya, Model Rx400 500mA 5730,  
473 Spectrum AP673L) switching on if sunlight flux rate dropped below 400  $\mu\text{mol m}^{-2} \text{s}^{-1}$ . Automatic watering kept  
474 soil in pots saturated. The selected *O. sativa* varieties were Shim Balte, Mudgo, Della and Luk Takhar, with  
475 Shading Ranks of 344, 330, 49 and 1, respectively. Germination protocol was followed as described above.  
476 Four plants were grown per pot, in each of the corners of a square pot (10 x 10 x 11 cm) in a substrate mix of  
477 black soil, vermiculite and sand in a ratio of 5 : 3 : 2 together with 6 g Osmocote and 1 l Yoshida nutrient  
478 solution per kg substrate. Pots were arranged at a distance of 10 cm in mixed plots. The experiment units (the  
479 eight plants that were measured) were surrounded by bordering plants to avoid border effects on the  
480 experimental units. Light intensity (photosynthetic active radiation (PAR) of 400-700 nm waveband) was  
481 measured at the ground level between rice plants (with six measurements in each of the three replicates) and  
482 above the plants for reference at the same time to calculate light extinction. PAR values can be found in  
483 Supplemental Table 4.

## 484 **Phenotype data for GWAS**

485 For the GWAS analyses, the mean values of all phenotypes were included, only *O. glaberrima* TOG7192 was  
486 excluded since it does not belong to the *O. sativa* species. We tested for the normal distribution across the  
487 recorded traits prior to running the GWAS. The list for all 344 varieties with 13 shoot trait values (as the mean  
488 value out of eight replicates, for raw data see Supplemental Data 1) which were used as input for GWAS can  
489 be found in Supplemental Table 5.

## 490 **Genotype data**

491 For the genotype data we have used two data sets publicly available at <http://ricediversity.org/data/index.cfm>  
492 [tools/](#). As a second dataset, we used the newer version of genomic data imputed HDRA with 4.8 M SNPs, from  
493 3,010 *O. sativa* varieties assembling the established Rice Reference Panel by merging the high-density rice  
494 array with 700 K SNPs from in total 1,568 *O. sativa* varieties including RDP1 (rice diversity panel 1), RDP2  
495 and NIAS (national institute of agrobiological sciences) from (McCouch et al., 2016) and 3000 Rice Genomes  
496 data sets (D. R. Wang et al., 2018). The data was curated by filtering for unique SNPs, 90% call rate (90%  
497 minimum count) and minor allele frequency  $\geq 5\%$ . We used the SNP data that adhere to the filtering criteria  
498 for 344 varieties that were included in the phenotypic screen, which resulted in total of 1.7 M SNPs remained  
499 as an input for the GWAS. As an average genome-wide linkage disequilibrium (LD) decay in rice we used  
500 previously calculated values (Zhao et al. 2011; Huang et al. 2010). LD is calculated by measuring the pairwise  
501 SNP LD among the common SNPs (with MAF > 0.05) using  $r^2$ , the correlation in frequency among pairs of  
502 alleles across a pair of markers, using the software PLINK (<http://zzz.bwh.harvard.edu/plink/>).

### 503 **Genome wide association study (GWAS)**

504 We used two different software packages to perform the GWAS. The first is an R package (R version 3.6.1) of  
505 Genomic Association and Prediction Integrated Tool (GAPIT) (Tang et al., 2016; Wang et al., 2018c). We  
506 employed a mixed linear model (MLM) (Yu et al., 2006) with the optimal number of Principal Components  
507 based on the calculated Bayesian information criterion (BIC) for each trait, including as coefficients a kinship  
508 matrix (K-matrix), based on clustering analysis to account for genetic relationship between individuals,  
509 together with the population structure (Q-matrix). The Manhattan plots for GWAS using the GAPIT can be  
510 found in Supplemental Data 5, for shoot area, hull area, perimeter, plant height, culm height, leaf length,  
511 solidity, number of leaves, number of tillers, dry weight, droopiness, leaf angle, tiller angle and the Sum of  
512 normalized traits. Shown are SNPs with MAF > 0.05, with the negative logarithmic p-values on the y-axis, for  
513 1.7 M SNPs across the 12 rice chromosomes along the x-axis. The second software package is lme4QTL  
514 (Ziyatdinov et al., 2018). We performed GWAS as described in the paper, taking population structure into  
515 account by using a kinship matrix. This kinship matrix was calculated using the cov() function in R 3.6  
516 (Supplemental Figure 2). The decomposition matrix to correct for population structure was made by following  
517 the lme4QTL protocol. It uses the relmatLmer(), varcov() and decompose\_varcov() functions in order. The  
518 obtained decomposition matrix, together with the traits and binary SNP matrix is then used in the matlm()  
519 function to calculate the significance and effect per SNP. The full list of detected significant SNP associations  
520 can be accessed at <https://doi.org/10.5281/zenodo.4730232> (Supplemental Data 3). As a confirmation for the  
521 reliability of SNP trait associations, we correlated the results of the two methods applied here (GAPIT and  
522 lme4QTL). We do not expect an exact overlap, as there is a small difference in how the kinship matrix is  
523 calculated and GAPIT uses MLM, whereas lme4QTL does not. The narrow sense heritability ( $h^2$ ) of the  
524 analysed traits was calculated with GAPIT (Supplemental Table 6). To set the significance threshold the rather  
525 conservative Bonferroni correction was applied, calculated by the  $-\log^{10}(\text{p-value of } 0.05/\Sigma\text{SNPs})$ , which  
526 corresponds to  $-\log_{10}(0.05/1.700.000) = -7.53$  for the imputed HDRA data set. To examine the GWAS model  
527 performance and estimate possible model overfitting, QQ plots were generated (Supplemental Data 6).

### 528 **Post-GWAS analysis**

529 For all follow-up analysis the output of the GWAS on the raw, untransformed phenotype data was used.

530 **Locus definition:** We determined loci to be of interest, if there are several significantly associated SNPs found  
531 in close proximity. Single SNPs passing the threshold were neglected, because whole-genome sequencing data  
532 provides enough markers in each linkage disequilibrium block. Since rice has a low rate of LD decay, this  
533 makes it more difficult to identify causal genes (Wang et al., 2020). Therefore, the local LD analysis was used  
534 to define LD clumps surrounding the index SNPs, using LD clumping in PLINK, where the local LD between  
535 SNPs is considered. A strong LD between SNPs is one of the three criteria that must be simultaneously  
536 satisfied. The other two criteria are p-value threshold set to 0.01 and physical distance set to 250 kb, given  
537 with the  $R^2$  value. We considered SNPs with  $-\log^{10}(\text{p-value}) > 5$  as index SNPs to perform the analysis and  
538 clump SNPs with p-value > 4. For the determination of loci of interest for weed-competitiveness, we focused

539 on the core traits culm height, shoot area, solidity and number of leaves. For culm height and number of leaves  
540 single significant SNPs were not found to be surrounded by other significant SNPs within LD and therefore  
541 did not meet our selection criteria. Since, dry weight is highly correlated with the traits of branchiness, we  
542 included the peaks found for dry weight as a representative locus for branchiness and similarly the loci for  
543 plant height as a representative of height related traits.

544 **Gene models:** Genetic regions covered by significant SNPs were searched for candidate genes using two  
545 different gene annotation models, which were then merged: the Michigan State University (MSU; 31 Oct. 2011  
546 - Release 7; <http://rice.plantbiology.msu.edu/>) and the Rice Annotation Project Database (RAP-DB; 24 March  
547 2020; <https://rapdb.dna.affrc.go.jp/>). Other data resources used, were the gene ID converter  
548 (<https://rapdb.dna.affrc.go.jp/tools/converter>), GALAXY – rice genome browser  
549 ([http://13.250.174.27:8080/?tool\\_id=getgenes&version=1.0.0&\\_\\_identifer=pxuu9t4bnk](http://13.250.174.27:8080/?tool_id=getgenes&version=1.0.0&__identifer=pxuu9t4bnk)) and SNP seek  
550 (<http://snp-seek.irri.org/>).

### 551 **Haplotype analysis**

552 In order to facilitate the identification of candidate genes within the found loci related to the canopy  
553 architecture, we performed haplotype analysis spanning the coding sequence regions of the genes within each  
554 locus. For each locus, we used the combined gene model annotation (MSU and RAP-DB) to identify the coding  
555 sequences belonging to individual genes (Supplemental Table 7). We subsequently compiled all SNPs that  
556 were within the coding sequence region into one haplotype and grouped all studied varieties based on their  
557 haplotype sequence. The haplotypes represented by 2 or less varieties were excluded from the analysis, due to  
558 low representation. Based on the haplotype grouping for each coding sequence, we performed a t-test for  
559 significant differences between the most abundant haplotype with all the other identified haplotypes for all  
560 measured traits. The individual haplotypes are represented by A/T, where A stands for reference accession  
561 sequence, and T for any alternative variant. Supplemental Data 8 contains the full list of coding sequences of  
562 genes within the defined loci of interest.

563

## 564 **Acknowledgements**

565 We thank Ricardo Eugenio and James Edgane for their substantial assistance in the phenotyping at the  
566 International Rice Research Institute and Yorit van de Kaa and Alba Schielen for their help with the  
567 experiments at Utrecht University. We thank Roel van Bezouw and Tom Theeuwen for helpful discussions  
568 about GWAS and Rens Voesenek, Evelyn Aparicio (Nelen & Schuurmans), Jochem Evers (WUR) and Jonne  
569 Rodenburg (University of Greenwich) for useful discussions on this research project.

## 570 **Supplemental Data**

571

572 **Supplemental Table 1:** List of rice varieties of screened rice diversity panel (RDP1) and description of origin.

573 **Supplemental Table 2:** Results for ANOVA (considered significant with  $p < 0.05$  ) and post-hoc based on  
574 Tukey's pairwise comparison of shoot traits between different rice varieties and between different  
575 subpopulations, mean out of eight replicates of 344 varieties, the sum of normalized core trait values and their  
576 Shading Rank. Raw data can be found in <https://doi.org/10.5281/zenodo.4730232> (Supplemental Data 1).

577 **Supplemental Table 3:** The list of 344 varieties with their normalized core trait values, the sum of normalized  
578 core trait values and their Shading Rank.

579 **Supplemental Table 4:** PAR values (photosynthetic active radiation of 400-700 nm waveband) and measured  
580 measured at the ground level under the rice canopy and reduction in light intensity (% PAR) compared to above  
581 the canopy for different rice varieties.

582 **Supplemental Table 5:** List of 344 varieties with 13 shoot trait values (as the mean value out of eight  
583 replicates, for raw data see Supplemental Data 1) which were used as input for genome-wide association  
584 studies, their normalized trait values, the sum of normalized core trait values and their Shading Rank.

585 **Supplemental Table 6:** Narrow sense heritability of all analysed traits in genome-wide association studies,  
586 calculated in GAPIT.

587 **Supplemental Table 7:** Full list of SNP positions in loci of interest with gene annotation and gene ontology  
588 categories from Rice Annotation Project Database.

589 **Supplemental Figure 1:** Scatter plots and  $R^2$  values for pair-wise correlation analysis for individual traits.

590 **Supplemental Figure 2:** Kinship matrix of screened rice diversity panel (RDP1).

591 **Supplemental Data 1** (<https://doi.org/10.5281/zenodo.4730232>): List of 344 varieties with raw data of 13  
592 shoot traits from eight replicates.

593 **Supplemental Data 2** (<https://doi.org/10.5281/zenodo.4730232>): Python script based on PlantCV used for  
594 image analysis.

595 **Supplemental Data 3** (<https://doi.org/10.5281/zenodo.4730232>): Association results for GWAS with  
596 lme4QTL using a mixed linear model (MLM) based on the lme4QTL protocol, for shoot area, hull area,  
597 perimeter, plant height, culm height, leaf length, solidity, number of leaves, number of tillers, dry weight,  
598 droopiness, leaf angle, tiller angle and the Sum of normalized traits.

599 **Supplemental Data 4:** Genetic regions underlying shoot architectural traits and seedling vigour in 4-week-  
600 old rice seedlings. Single-trait genome-wide association studies (GWAS) using a mixed linear model (MLM)  
601 based on the lme4QTL protocol, for droopiness, leaf angle, tiller angle, SUM\_norm\_traits, number of leaves,

602 number of tillers, culm height, leaf length hull area and perimeter. The Manhattan plots depict the single  
603 nucleotide polymorphisms (SNPs) with minor allele frequencies (MAF) > 0.05. Negative logarithmic P-values  
604 on the y-axis, for 1.7 M SNPs across the 12 rice chromosomes along the x-axis. P-values of association results  
605 for all traits can be found in Supplemental Data 3.

606 **Supplemental Data 5:** Genetic regions underlying shoot architectural traits and seedling vigour in 4-week-  
607 old rice seedlings. Single-trait GWAS using a mixed linear model (MLM) with the GAPIT package in R, for  
608 shoot area, hull area, perimeter, plant height, culm height, leaf length, solidity, number of leaves, number of  
609 tillers, dry weight, droopiness, leaf angle, tiller angle and the Sum of normalized traits. The Manhattan plots  
610 depict the single nucleotide polymorphisms (SNPs) with minor allele frequencies (MAF) > 0.05. Negative  
611 logarithmic P values on the y-axis, for 1.7 M SNPs across the 12 rice chromosomes along the x-axis.

612 **Supplemental Data 6:** QQ plots with negative logarithmic P values for observed on the y-axis and expected  
613 SNP - trait associations on the x-axis.

614 **Supplemental Data 7:** Haplotype groups for all determined loci of interest with their phenotype effect for 13  
615 investigated shoot traits.

616 **Supplemental Data 8:** List of sequences of genes for loci of interest, with haplotypes for screened varieties.

617 **Tables**

618

619 **Table 1:** Description of 13 investigated shoot traits.

| Trait                | Unit            | Description                                                                                                       |
|----------------------|-----------------|-------------------------------------------------------------------------------------------------------------------|
| Number of leaves     |                 | Number of all visible green leaf blades                                                                           |
| Number of tillers    |                 | Number of side branches classified as tillers as soon as it splits off the culm having two leaves                 |
| Total plant height   | cm              | Height from soil to the straightened topmost leaf tip                                                             |
| Culm height          | cm              | Mother stem - from soil to highest node, where youngest leaf blade bends off                                      |
| Leaf length          | cm              | Length of longest leaf blade                                                                                      |
| Projected shoot area | cm <sup>2</sup> | All green leaf area projected from top view                                                                       |
| Convex hull area     | cm <sup>2</sup> | Smallest area enclosing outermost leaf tips                                                                       |
| Shoot perimeter      | cm              | Outline of the projected shoot area                                                                               |
| Leaf angle           | °               | Angle between culm and leaf blade initiation measured for second and third leaf                                   |
| Tiller angle         | °               | Angle between the culm and tillers, measured for the left and right outermost tillers                             |
| Leaf droopiness      | °               | Interception angle of two tangents aligned to initiation and tip of leaf blade measured for second and third leaf |
| Dry weight shoot     | g               | Dry matter of shoot biomass after drying in oven at 70 C for 48 h                                                 |
| Solidity             |                 | Ratio of projected shoot area divided by convex hull area                                                         |

620

621 **Table 2: Core groups of shoot traits.** For core groups with multiple traits, we have selected a representative

622 trait as the core trait, shown in bold.

| Core groups  | Measured shoot architectural traits                       |
|--------------|-----------------------------------------------------------|
| Area         | <b>Projected shoot area</b> , convex hull area, perimeter |
| Branchiness  | <b>Number of leaves</b> , number of tillers, dry weight   |
| Height       | <b>Culm height</b> , leaf length, plant height            |
| Solidity     | Solidity                                                  |
| Leaf angle   | Leaf angle                                                |
| Tiller angle | Tiller angle                                              |
| Droopiness   | Droopiness                                                |

623

624



625 **Table 3: Shading Rank** for ten highest and ten lowest ranking varieties, and for varieties of special interest  
 626 (Mudgo, IR 64-21, Nipponbare and Della) with normalized core trait values (between 0 as lowest and 100  
 627 highest) compared to the min and max values within the screened panel and the sum of the core traits. Varieties  
 628 in bold are visualized in Figure 3. The Shading Rank ranges from 344 as the highest and 1 as the lowest. The  
 629 list of Shading Ranks for the entire panel can be found in Supplemental Table 3.

| Variety             | Subpopulation | Shoot area.norm | Number of leaves.norm | Solidity.norm | Culm height.norm | Leaf angle.norm | Tiller angle.norm | Droopiness.norm | SUM_norm_traits | Shading Rank |
|---------------------|---------------|-----------------|-----------------------|---------------|------------------|-----------------|-------------------|-----------------|-----------------|--------------|
| <b>SHIM BALTE</b>   | <b>aus</b>    | <b>78</b>       | <b>85</b>             | <b>73</b>     | <b>86</b>        | <b>94</b>       | <b>65</b>         | <b>79</b>       | <b>561</b>      | <b>344</b>   |
| <b>SZE GUEN ZIM</b> | <b>ind</b>    | <b>100</b>      | <b>100</b>            | <b>95</b>     | <b>38</b>        | <b>15</b>       | <b>55</b>         | <b>67</b>       | <b>470</b>      | <b>343</b>   |
| PARAIBA CHINES NOVA | ind           | 77              | 55                    | 51            | 64               | 25              | 100               | 90              | 462             | 342          |
| P 737               | aus           | 91              | 56                    | 69            | 84               | 42              | 49                | 68              | 458             | 341          |
| SHIRKATI            | aus           | 93              | 61                    | 68            | 51               | 8               | 85                | 80              | 446             | 340          |
| SABHARAJ            | ind           | 94              | 78                    | 63            | 54               | 23              | 57                | 73              | 443             | 339          |
| PAUNG MALAUNG       | aus           | 89              | 56                    | 97            | 52               | 16              | 45                | 85              | 440             | 338          |
| NIRA                | ind           | 80              | 64                    | 56            | 47               | 32              | 70                | 82              | 431             | 337          |
| SATHI               | aus           | 67              | 59                    | 66            | 73               | 22              | 52                | 81              | 420             | 336          |
| MTU9                | ind           | 86              | 46                    | 57            | 79               | 19              | 48                | 82              | 417             | 335          |
| <b>MUDGO</b>        | <b>ind</b>    | <b>73</b>       | <b>30</b>             | <b>57</b>     | <b>79</b>        | <b>20</b>       | <b>53</b>         | <b>95</b>       | <b>407</b>      | <b>330</b>   |
| <b>IR 64-21</b>     | <b>ind</b>    | <b>16</b>       | <b>59</b>             | <b>41</b>     | <b>13</b>        | <b>16</b>       | <b>32</b>         | <b>78</b>       | <b>254</b>      | <b>74</b>    |
| <b>NIPPONBARE</b>   | <b>tej</b>    | <b>19</b>       | <b>25</b>             | <b>52</b>     | <b>25</b>        | <b>13</b>       | <b>42</b>         | <b>77</b>       | <b>253</b>      | <b>73</b>    |
| <b>DELLA</b>        | <b>trj</b>    | <b>11</b>       | <b>6</b>              | <b>12</b>     | <b>38</b>        | <b>66</b>       | <b>46</b>         | <b>56</b>       | <b>234</b>      | <b>49</b>    |
| COCODRIE            | trj           | 10              | 11                    | 22            | 39               | 23              | 26                | 38              | 168             | 10           |
| L 202               | trj           | 1               | 10                    | 9             | 27               | 14              | 44                | 61              | 166             | 9            |
| TRIOMPHE DU MAROC   | tej           | 2               | 10                    | 51            | 52               | 22              | 25                | 2               | 165             | 8            |
| S 4542 A 3-49B-2-12 | trj           | 4               | 8                     | 7             | 48               | 5               | 43                | 43              | 159             | 7            |
| TAINAN IKU 487      | tej           | 5               | 24                    | 38            | 36               | 12              | 19                | 19              | 154             | 6            |
| PI 298967-1         | adm           | 5               | 11                    | 1             | 42               | 17              | 34                | 34              | 143             | 5            |
| SHIROGANE           | tej           | 4               | 17                    | 14            | 19               | 12              | 34                | 43              | 142             | 4            |
| BUL ZO              | tej           | 10              | 8                     | 20            | 45               | 22              | 21                | 11              | 137             | 3            |
| GUINEANDAO          | adm           | 10              | 14                    | 9             | 38               | 8               | 40                | 9               | 127             | 2            |
| <b>LUK TAKHAR</b>   | <b>tej</b>    | <b>3</b>        | <b>8</b>              | <b>26</b>     | <b>17</b>        | <b>5</b>        | <b>44</b>         | <b>0</b>        | <b>103</b>      | <b>1</b>     |

630

631

632 **Table 4: Loci of interest for traits of core groups for shading potential** (solidity, plant height, shoot area,  
633 and dry weight) with significant SNPs (LOD > 5 as index SNPs) and clumped SNPs (LOD > 4) in local LD  
634 up- and downstream. Full list of SNP positions in loci of interest can be found in Supplemental Table 7.

| Trait               | Locus  | Chromosome | Index SNP_ID    | Position | Span_locus [kb] | Coordinates_locus [kb]  |
|---------------------|--------|------------|-----------------|----------|-----------------|-------------------------|
| <b>Solidity</b>     | Locus1 | 3          | SNP-3.35500735. | 35507867 | 404             | chr3:35347550..35752533 |
| <b>Plant height</b> | Locus2 | 5          | SNP-5.20612311. | 20674871 | 59              | chr5:20621852..20680955 |
| <b>Plant height</b> | Locus3 | 6          | SNP-6.13994152. | 13995152 | 240             | chr6:13754207..13995152 |
| <b>Shoot area</b>   | Locus4 | 7          | SNP-7.25787749. | 25788744 | 146             | chr7:25659129..25806056 |
| <b>Dry weight</b>   | Locus5 | 7          | SNP-7.25766799. | 25767794 | 35              | chr7:25767794..25803081 |
| <b>Dry weight</b>   | Locus6 | 11         | SNP-11.6059294. | 6063543  | 23              | chr11:6039907..6063875  |

635

636 **Table 5: Summary of determined loci of interest** with the Locus ID and gene annotation. Loci represented  
 637 in Figure 6 are highlighted in bold. Full list of SNP positions in loci of interest with gene annotation and gene  
 638 ontology categories can be found in Supplemental Table 7.

| Trait        | Locus  | Chromosome | Locus_ID            | Gene annotation                                                  |
|--------------|--------|------------|---------------------|------------------------------------------------------------------|
| Solidity     | Locus1 | 3          | Os03g0841800        | GSK3/SHAGGY-like kinase                                          |
|              |        |            | Os03g0841850        | Hypothetical protein.                                            |
|              |        |            | Os03g0843700        | FAR1 domain containing protein.                                  |
|              |        |            | <b>Os03g0845000</b> | <b>Similar to Pirin-like protein.</b>                            |
|              |        |            | <b>Os03g0845700</b> | <b>Similar to RPB17 (Fragment).</b>                              |
|              |        |            | Os03g0845800        | Conserved hypothetical protein.                                  |
|              |        |            | Os03g0848700        | Coiled-coil, nucleotide-binding, and leucine-rich repeat protein |
| Plant height | Locus2 | 5          | Os05g0420500        | Conserved hypothetical protein.                                  |
|              |        |            | <b>Os05g0420600</b> | <b>Cytochrome c.</b>                                             |
|              |        |            | <b>Os05g0420900</b> | <b>Conserved hypothetical protein.</b>                           |
| Plant height | Locus3 | 6          | Os06g0269300        | TolB-like domain containing protein.                             |
|              |        |            | Os06g0346300        | acyl-CoA oxidase/ oxidoreductase                                 |
| Shoot area   | Locus4 | 7          | <b>Os07g0623200</b> | <b>Heavy metal transporter protein; ATPase, P-type.</b>          |
|              |        |            | Os07g0623501        | Hypothetical gene.                                               |
|              |        |            | Os07g0623600        | Similar to mRNA, clone: RTFL01-43-H20.                           |
| Dry weight   | Locus5 | 7          | Os07g0623200        | Heavy metal transporter protein; ATPase, P-type.                 |
|              |        |            | Os07g0623501        | Hypothetical gene.                                               |
|              |        |            | Os07g0623600        | Similar to mRNA, clone: RTFL01-43-H20.                           |
| Dry weight   | Locus6 | 11         | <b>Os11g0216000</b> | <b>Pyruvate kinase family protein.</b>                           |

## 639 **Figure legends**

640

641 **Figure 1: Shoot traits in rice differ between subpopulations.** Distribution of investigated shoot traits in the  
642 screened diversity panel. The plots represent the trait value (y-axis) observed for varieties grouped according  
643 to different subpopulations on x-axis. A) Shoot area [cm<sup>2</sup>], B) Hull area [cm<sup>2</sup>], C) Perimeter [cm], D) Solidity,  
644 E) Dry weight [g], F) number of leaves, G) Number of tillers, H) Plant height [cm], I) Leaf length [cm], J)  
645 Culm height [cm], K) Leaf angle [°], L) Tiller angle [°] and M) Droopiness [°]. Each data point represents the  
646 mean out of 8 replicates for each of the 344 varieties. The colours represent different groups of subpopulations,  
647 ind – *indica*, aus, adm – *admixed*, aro – *aromatic*, trj – *tropical japonica* and tej – *temperate japonica*. The  
648 letters in the graphs represent the significantly different groups, as determined with Tukey's HSD with p-value  
649 < 0.05. Mean values for all 13 traits and the sum of the normalized traits including results for Tukey's pairwise  
650 post hoc test can be found in Supplemental Table 2.

651 **Figure 2: Correlation and clustering of 13 shoot traits defines core groups of traits.** A) Pearson Correlation  
652 coefficients between traits. The colour and size of the circles reflect the strength of the correlation. B)  
653 Hierarchical Cluster Analysis. Traits are clustered using ward.D2 method. Rows represent 13 studied shoot  
654 traits. The values of individual samples are normalized per trait using z-Fisher transformation scaled prior to  
655 clustering. Based on a cut off at seven clusters and together with the correlation coefficients, we grouped  
656 together the traits into defined core groups.

657 **Figure 3: Visualization of shading potential in the investigated rice diversity panel based on cor traits**  
658 **for the Shading Rank.** A) - D) Scatter plots showing the distribution of 344 rice varieties in pair-wise  
659 combination of four core traits, shoot area, number of leaves, solidity and culm height. Representative high  
660 (344, 343 and 330) and low (49 and 1) ranking varieties together with Nipponbare (73) and IR 64-21 (74) are  
661 highlighted in colours. B) Top view images of representative varieties, with colour coded frames. Numbers are  
662 respective Shading Ranks as found in Table 3.

663 **Figure 4: Shading Rank predicts the canopy shading capacity of high and low ranking rice varieties.**  
664 Significant difference in shading capacity between canopies of different rice varieties at five weeks after  
665 sowing. The plot shows the reduction in light intensity (% PAR) measured at the ground level under the rice  
666 canopy compared to above the canopy, for different rice varieties on x-axis, where Della and Luk Takhar were  
667 classified as non-competitive (blue) with Shading ranks of 49 and 1, respectively and Mudgo and Shim Balte  
668 as competitive (green) with Shading Ranks of 330 and 344, respectively. Letters indicate significance (ANOVA  
669 with Tukey's pairwise comparison post hoc test p < 0.05). Measured PAR values (photosynthetic active  
670 radiation of 400-700 nm waveband) can be found in Supplemental Table 4.

671 **Figure 5: GWAS identifies putative the genetic regions underlying shoot architectural traits** and seedling  
672 vigour in 4-week-old rice seedlings, reflecting the early vegetative growth stage. We used single-trait genome-  
673 wide association studies (GWAS) with a mixed linear model (MLM) for plant height, solidity, shoot area and

674 dry weight. The Manhattan plots depict the single nucleotide polymorphisms (SNPs) with minor allele  
675 frequencies (MAF) > 0.05. Negative logarithmic p-values on the y-axis, for 1.7 M SNPs across the 12 rice  
676 chromosomes along the x-axis. Dashed red lines indicate significance threshold set at  $-\log_{10}(\text{p-value}) > 7.5$ .  
677 Genomic regions highlighted in green are loci of interest (numbered L1 – L6).

678 **Figure 6: Haplotypes for genes of interest associated with increased trait values.** Locus 1 was detected for  
679 solidity with haplotypes in the coding sequence of the genes A) Os03g0845000 consisting of two SNPs and  
680 B) Os03g0845700 consisting of one SNPs. Locus 2 was detected for plant height with haplotypes in the coding  
681 sequence of the genes C) Os05g0420600 consisting of four SNPs and B) Os05g0420900 consisting of six  
682 SNPs. Locus 4 was detected for shoot area and dry weight with haplotypes in the coding sequence of the gene  
683 Os07g0623200 consisting of four SNPs shown for E) shoot area and F) dry weight. Locus 6 was detected for  
684 dry weight encoding only one gene G) Os11g0216000 with haplotypes consisting of nine SNPs. Dot plots for  
685 t-test, comparing each haplotype with the most abundant (blue) haplotype, on core traits for shading potential.  
686 Y-axis trait value, x-axis groups of haplotypes. Additional information about the detected genes can be found  
687 in Table 5 and dot plots for haplotypes for all 13 traits found in loci of interest are shown in Supplemental  
688 Figure 5.

## 689 **References**

- 690 Acevedo-Siaca, L.G., Coe, R., Wang, Y., Kromdijk, J., Quick, W.P., and Long, S.P. (2020). Variation in  
691 photosynthetic induction between rice accessions and its potential for improving productivity. *New Phytol.*  
692 *nph.16454*.
- 693 Andrew, I.K.S., Storkey, J., and Sparkes, D.L. (2015). A review of the potential for competitive cereal cultivars  
694 as a tool in integrated weed management. *Weed Res.* *55*, 239–248.
- 695 Ballaré, C.L., and Pierik, R. (2017). The shade-avoidance syndrome: multiple signals and ecological  
696 consequences. *Plant. Cell Environ.* *40*, 2530–2543.
- 697 Brainard, D.C., Bellinder, R.R., and DiTommaso, A. (2005). Effects of canopy shade on the morphology,  
698 phenology, and seed characteristics of Powell amaranth (*Amaranthus powellii*). *Weed Sci.* *53*, 175–186.
- 699 Casal, J.J. (2012). Shade Avoidance. 1–19.
- 700 Caton, B.P., Cope, A.E., and Mortimer, M. (2003). Growth traits of diverse rice cultivars under severe  
701 competition: Implications for screening for competitiveness. *F. Crop. Res.* *83*, 157–172.
- 702 Chakraborty, D., Ladha, J.K., Rana, D.S., Jat, M.L., Gathala, M.K., Yadav, S., Rao, A.N., Ramesha, M.S., and  
703 Raman, A. (2017). A global analysis of alternative tillage and crop establishment practices for economically  
704 and environmentally efficient rice production. *Sci. Rep.* *7*, 1–11.
- 705 Chauhan, B.S. (2012). Weed Ecology and Weed Management Strategies for Dry-Seeded Rice in Asia. *Weed*  
706 *Technol.* *26*, 1–13.
- 707 Chauhan, B., and Yadav, A. (2013). Weed management approaches for dry-seeded rice in India: a review.  
708 *Indian J. Weed Sci.* *45*, 1–6.
- 709 Chauhan, B.S., Jabran, K., and Mahajan, G. (2017). *Rice Production Worldwide* (Springer Nature).
- 710 Chen, K., Zhang, Q., Wang, C.C., Liu, Z.X., Jiang, Y.J., Zhai, L.Y., Zheng, T.Q., Xu, J.L., and Li, Z.K. (2019).  
711 Genetic dissection of seedling vigour in a diverse panel from the 3,000 Rice (*Oryza sativa* L.) Genome Project.  
712 *Sci. Rep.* *9*.
- 713 Cordero-Lara, K.I., Kim, H., and Tai, T.H. (2016). Identification of Seedling Vigor-Associated Quantitative  
714 Trait Loci in Temperate Japonica Rice. *Plant Breed. Biotechnol.* *4*, 426–440.
- 715 Dimaano, N.G.B., Ali, J., Sta. Cruz, P.C., Baltazar, A.M., Diaz, M.G.Q., Acero, B.L., and Li, Z. (2017).  
716 Performance of Newly Developed Weed-Competitive Rice Cultivars under Lowland and Upland Weedy  
717 Conditions. *Weed Sci.* *65*, 798–817.
- 718 Dingkuhn, M., Tivet, F., Siband, P.-L., Asch, F., Audebert, A., Sow, A., and International Rice Research  
719 Conference. Los Banos Philippines), P. 2000-03-31/2000-04-03; I. (Los B. (2001). Varietal differences in  
720 specific leaf area: a common physiological determinant of tillering ability and early growth vigor? In *Rice*

- 721 Research for Food Security and Poverty Alleviation. Proceedings of the International Rice Research  
722 Conference, 31 March - 3 April 2000, S. Peng, and B. Hardy, eds. (Los Banos, Philippines), pp. 95–108.
- 723 Eizenga, G.C., Ali, M.L., Bryant, R.J., Yeater, K.M., McClung, A.M., and McCouch, S.R. (2014). Registration  
724 of the Rice Diversity Panel 1 for Genomewide Association Studies. *J. Plant Regist.* 8, 109.
- 725 Fahlgren, N., Feldman, M., Gehan, M.A., Wilson, M.S., Shyu, C., Bryant, D.W., Hill, S.T., McEntee, C.J.,  
726 Warnasooriya, S.N., Kumar, I., et al. (2015). A versatile phenotyping system and analytics platform reveals  
727 diverse temporal responses to water availability in *Setaria*. *Mol. Plant* 8, 1520–1535.
- 728 FAO, F. and A.O. of the U.N. (2019). World Food and Agriculture – Statistical pocketbook 2019 (Rome).
- 729 Farooq, M., Siddique, K.H.M.M., Rehman, H., Aziz, T., Lee, D.-J.J., and Wahid, A. (2011). Rice direct seeding:  
730 Experiences, challenges and opportunities.
- 731 Franklin, K.A. (2008). Shade avoidance. *New Phytol.* 179, 930–944.
- 732 Gehan, M.A., Fahlgren, N., Abbasi, A., Berry, J.C., Callen, S.T., Chavez, L., Doust, A.N., Feldman, M.J.,  
733 Gilbert, K.B., Hodge, J.G., et al. (2017). PlantCV v2: Image analysis software for high-throughput plant  
734 phenotyping. *PeerJ* 5, e4088.
- 735 Ghosal, S., Casal, C., Quilloy, F.A., Septiningsih, E.M., Mendiolo, M.S., and Dixit, S. (2019). Deciphering  
736 Genetics Underlying Stable Anaerobic Germination in Rice: Phenotyping, QTL Identification, and Interaction  
737 Analysis. *Rice* 12.
- 738 Haefele, S. M., Johnson, D. E., M’Bodj, D., Wopereis, M.C. C.S., Miezán, K. M., M’Bodj, D., Wopereis, M.C.  
739 C.S., and Miezán, K. M. (2004). Field screening of diverse rice genotypes for weed competitiveness in irrigated  
740 lowland ecosystems. *F. Crop. Res.* 88, 29–46.
- 741 Huang, X., Wei, X., Sang, T., Zhao, Q., Feng, Q., Zhao, Y., Li, C., Zhu, C., Lu, T., Zhang, Z., et al. (2010).  
742 Genome-wide association studies of 14 agronomic traits in rice landraces. *Nat. Genet.* 42, 961–967.
- 743 International Rice Research Institute (2013). SES (Standard Evaluation System) for Rice (Manila, Philippines).
- 744 Julkowska, M.M., Saade, S., Agarwal, G., Gao, G., Pailles, Y., Morton, M., Awlia, M., and Tester, M. (2019).  
745 MVApp—Multivariate Analysis Application for Streamlined Data Analysis and Curation. *180*, 1261–1276.
- 746 Kennedy, G., and Burlingame, B. (2003). Analysis of food composition data on rice from a plant genetic  
747 resources perspective. *Food Chemistry* 80, 589–596.
- 748 Kretschmar, T., Pelayo, M.A.F., Trijatmiko, K.R., Gabunada, L.F.M., Alam, R., Jimenez, R., Mendiolo, M.S.,  
749 Slamet-Loedin, I.H., Sreenivasulu, N., Bailey-Serres, J., et al. (2015). A trehalose-6-phosphate phosphatase  
750 enhances anaerobic germination tolerance in rice. *Nat. Plants* 1, 1–5.
- 751 Kumar, V., and Ladha, J.K. (2011). Direct Seeding of Rice. Recent Developments and Future Research Needs  
752 (Academic Press).



- 753 Li, M., Liu, X., Bradbury, P., Yu, J., Zhang, Y.M., Todhunter, R.J., Buckler, E.S., and Zhang, Z. (2014).  
754 Enrichment of statistical power for genome-wide association studies. *BMC Biol.* *12*, 73.
- 755 Liakat Ali, M., McClung, A.M., Jia, M.H., Kimball, J.A.J.A., McCouch, S.R., Eizenga, G.C., McCouch, S.R.,  
756 and Georgia, C.E. (2011). A Rice Diversity Panel Evaluated for Genetic and Agro-Morphological Diversity  
757 between Subpopulations and its Geographic Distribution. *Crop Sci.* *51*, 2021–2035.
- 758 Mackill, D.J., and Khush, G.S. (2018). IR64: a high-quality and high-yielding mega variety. *Rice* *11*, 18.
- 759 Mahajan, G., and Chauhan, B.S. (2013). The role of cultivars in managing weeds in dry-seeded rice production  
760 systems. *Crop Prot.*
- 761 McCouch, S.R., Wright, M.H., Tung, C.-W.W., Maron, L.G., McNally, K.L., Fitzgerald, M., Singh, N.,  
762 DeClerck, G., Agosto-Perez, F., Korniliev, P., et al. (2016). Open access resources for genome-wide association  
763 mapping in rice. *Nat. Commun.* *7*, 10532.
- 764 Mennan, H., Ngouajio, M., Sahin, M., Isik, D., and Altop, K. (2012). Competitiveness of rice (*Oryza sativa*  
765 L.) cultivars against *Echinochloa crus-galli* (L.) Beauv. in water-seeded production systems. *Crop Prot.* *41*, 1–  
766 9.
- 767 Namuco, O.S.S., Cairns, J.E.E., and Johnson, D.E.E. (2009). Investigating early vigour in upland rice (*Oryza*  
768 *sativa* L.): Part I. Seedling growth and grain yield in competition with weeds. *F. Crop. Res.* *113*, 197–206.
- 769 Oliver, V., Cochrane, N., Magnusson, J., Brachi, E., Monaco, S., Volante, A., Courtois, B., Vale, G., Price, A.,  
770 and Teh, Y.A. (2019). Effects of water management and cultivar on carbon dynamics, plant productivity and  
771 biomass allocation in European rice systems. *Sci. Total Environ.* *685*, 1139–1151.
- 772 Pierik, R., and De Wit, M. (2014). Shade avoidance: phytochrome signalling and other aboveground neighbour  
773 detection cues. *J. Exp. Bot.* *65*, 2815–2824.
- 774 Poorter, H., Niklas, K.J., Reich, P.B., Oleksyn, J., Poot, P., and Mommer, L. (2012). Biomass allocation to  
775 leaves, stems and roots: meta-analyses of interspecific variation and environmental control. *New Phytol.* *193*,  
776 30–50.
- 777 R Core Team (2020). R: A language and environment for statistical computing. R Foundation for Statistical  
778 Computing, Vienna, Austria. URL <https://www.R-project.org/>.
- 779 Rao, A.N., Johnson, D.E., Sivaprasad, B., Ladha, J.K., and Mortimer, A.M. (2007). Weed Management in  
780 Direct-Seeded Rice. *Adv. Agron.* *93*, 153–255.
- 781 Roig-Villanova, I., and Martínez-García, J.F. (2016). Plant Responses to Vegetation Proximity: A Whole Life  
782 Avoiding Shade. *Front. Plant Sci.* *7*, 236.

- 783 Sakamoto, T., Morinaka, Y., Ohnishi, T., Sunohara, H., Fujioka, S., Ueguchi-Tanaka, M., Mizutani, M., Sakata,  
784 K., Takatsuto, S., Yoshida, S., et al. (2006). Erect leaves caused by brassinosteroid deficiency increase biomass  
785 production and grain yield in rice. *Nat. Biotechnol.* *24*, 105–109.
- 786 Seavers, G.P., and Wright, K.J. (1999). Crop canopy development and structure influence weed suppression.  
787 *Weed Res.* *39*, 319–328.
- 788 Subedi, S.R., Sandhu, N., Singh, V.K., Sinha, P., Kumar, S., Singh, S.P., Ghimire, S.K., Pandey, M., Yadaw,  
789 R.B., Varshney, R.K., et al. (2019). Genome-wide association study reveals significant genomic regions for  
790 improving yield, adaptability of rice under dry direct seeded cultivation condition. *BMC Genomics* *20*, 471.
- 791 Tang, Y., Liu, X., Wang, J., Li, M., Wang, Q., Tian, F., Su, Z., Pan, Y., Liu, D., Lipka, A.E., et al. (2016). GAPIT  
792 Version 2: An Enhanced Integrated Tool for Genomic Association and Prediction. *Plant Genome* *9*.
- 793 Teichmann, T., and Muhr, M. (2015). Shaping plant architecture. *Front. Plant Sci.* *6*, 233.
- 794 Wang, D.R., Agosto-Pérez, F.J., Chebotarov, D., Shi, Y., Marchini, J., Fitzgerald, M., McNally, K.L.,  
795 Alexandrov, N., and McCouch, S.R. (2018a). An imputation platform to enhance integration of rice genetic  
796 resources. *Nat. Commun.* *9*, 3519.
- 797 Wang, F., Longkumer, T., Catausan, S.C., Calumpang, C.L.F., Tarun, J.A., Cattin-Ortola, J., Ishizaki, T.,  
798 Pariasca Tanaka, J., Rose, T., Wissuwa, M., et al. (2018b). Genome-wide association and gene validation  
799 studies for early root vigour to improve direct seeding of rice. *Plant Cell Environ.* *41*, 2731–2743.
- 800 Wang, Q., Tian, F., Pan, Y., Buckler, E.S., and Zhang, Z. (2018c). User Manual for Genomic Association and  
801 Prediction Integrated Tool.
- 802 Wang, Q., Tang, J., Han, B., and Huang, X. (2020). Advances in genome-wide association studies of complex  
803 traits in rice. *Theor. Appl. Genet.* 1415–1425.
- 804 Weiner, J., Andersen, S.B., Wille, W.K., Griepentrog, H.W., and Olsen, J.M. (2010). Evolutionary  
805 Agroecology: the potential for cooperative, high density, weed-suppressing cereals. *Evol. Appl.* *3*, 473–479.
- 806 Wing, R.A., Purugganan, M.D., and Zhang, Q. (2018). The rice genome revolution: from an ancient grain to  
807 Green Super Rice. *Nat. Rev. Genet.* *1*.
- 808 Worthington, M., and Reberg-Horton, C. (2013). Breeding Cereal Crops for Enhanced Weed Suppression:  
809 Optimizing Allelopathy and Competitive Ability. *J. Chem. Ecol.* *39*, 213–231.
- 810 Xu, L., Li, X., Wang, X., Xiong, D., and Wang, F. (2019). Comparing the grain yields of direct-seeded and  
811 transplanted rice: A meta-analysis. *Agronomy* *9*, 767.
- 812 Yang, W., Guo, Z., Huang, C., Duan, L., Chen, G., Jiang, N., Fang, W., Feng, H., Xie, W., Lian, X., et al.  
813 (2014). Combining high-throughput phenotyping and genome-wide association studies to reveal natural  
814 genetic variation in rice. *Nat. Commun.* *5*.

- 815 Yu, J., Pressoir, G., Briggs, W.H., Bi, I.V., Yamasaki, M., Doebley, J.F., McMullen, M.D., Gaut, B.S., Nielsen,  
816 D.M., Holland, J.B., et al. (2006). A unified mixed-model method for association mapping that accounts for  
817 multiple levels of relatedness. *Nat. Genet.* *38*, 203–208.
- 818 Zhang, P., Kowalchuk, G.A., Soons, M.B., Hefting, M.M., Chu, C., Firm, J., Brown, C.S., Zhou, X.X., Zhou,  
819 X.X., Guo, Z., et al. (2019). SRU D: A simple non-destructive method for accurate quantification of plant  
820 diversity dynamics. *J. Ecol.* *107*, 2155–2166.
- 821 Zhang, Z.-H., Wang, K., Guo, L., Zhu, Y.-J., Fan, Y.-Y., Cheng, S.-H., and Zhuang, J.-Y. (2012). Pleiotropism  
822 of the Photoperiod-Insensitive Allele of Hd1 on Heading Date, Plant Height and Yield Traits in Rice. *PLoS*  
823 *One* *7*, e52538.
- 824 Zhao, D.L., Atlin, G.N., Bastiaans, L., and Spiertz, J.H.J. (2006a). Developing selection protocols for weed  
825 competitiveness in aerobic rice. *F. Crop. Res.* *97*, 272–285.
- 826 Zhao, D.L., Atlin, G.N., Bastiaans, L., and Spiertz, J.H.J. (2006b). Comparing rice germplasm groups for  
827 growth, grain yield and weed-suppressive ability under aerobic soil conditions. *Weed Res.* *46*, 444–452.
- 828 Zhao, D.L., Bastiaans, L., Atlin, G.N., and Spiertz, J.H.J. (2007). Interaction of genotype  $\times$  management on  
829 vegetative growth and weed suppression of aerobic rice. *F. Crop. Res.* *100*, 327–340.
- 830 Zhao, K., Tung, C., Eizenga, G.C., Wright, M.H., Ali, M.L., Price, A.H., Norton, G.J., Islam, M.R., Reynolds,  
831 A., Mezey, J., et al. (2011). Genome-wide association mapping reveals a rich genetic architecture of complex  
832 traits in *Oryza sativa*. *Nat. Commun.* *2*, 1–10.
- 833 Ziyatdinov, A., Vázquez-Santiago, M., Brunel, H., Martínez-Perez, A., Aschard, H., and Soria, J.M. (2018).  
834 lme4qtl: linear mixed models with flexible covariance structure for genetic studies of related individuals. *BMC*  
835 *Bioinformatics* *19*, 68.

## 836 Figures

837

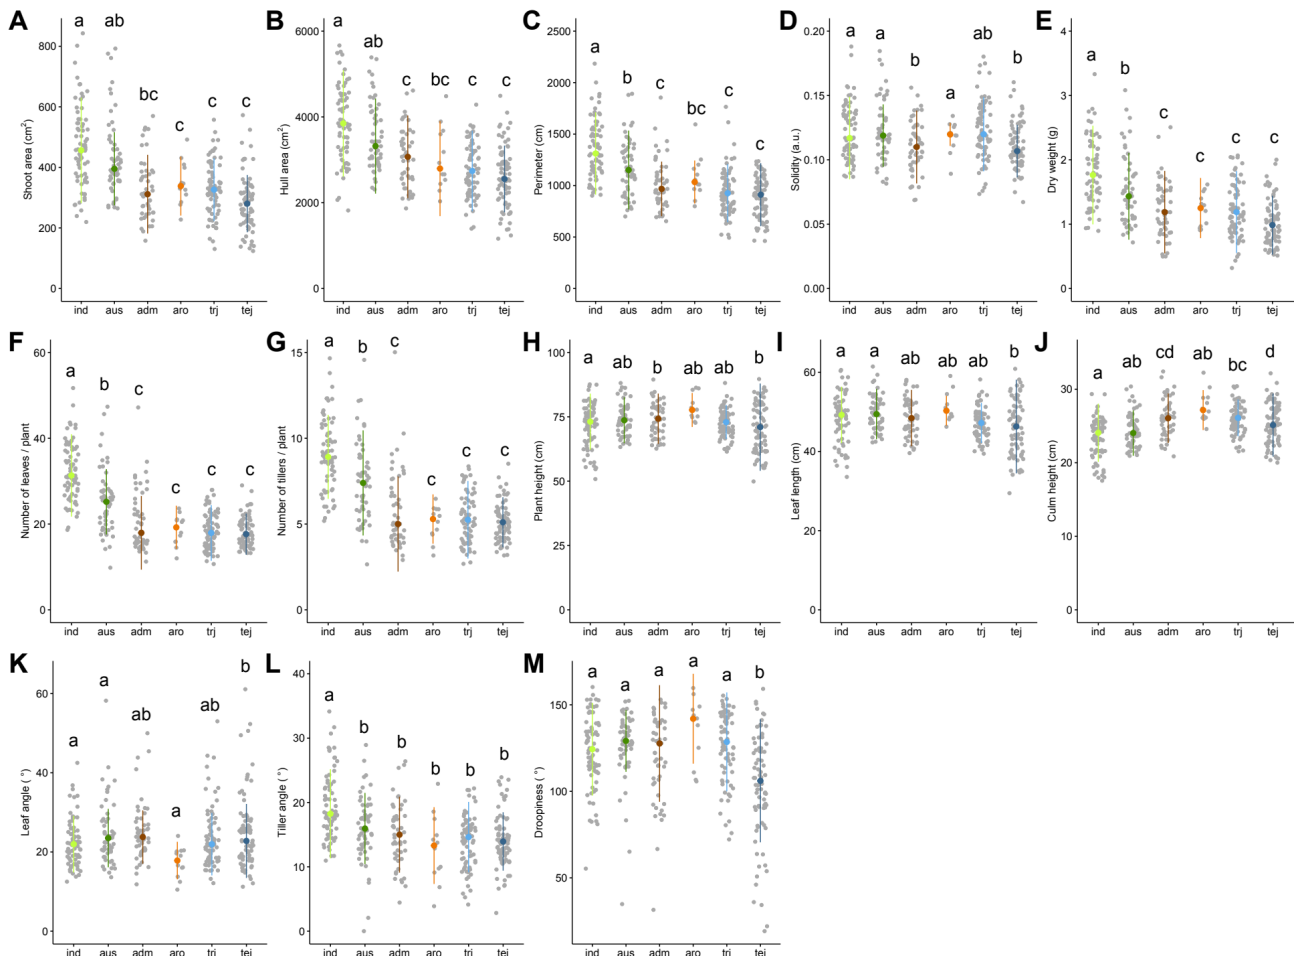

838 **Figure 1: Shoot traits in rice differ between subpopulations.** Distribution of investigated shoot traits in the screened diversity panel.  
 839 The plots represent the trait value (y-axis) observed for varieties grouped according to different subpopulations on x-axis. A) Shoot area  
 840 [cm<sup>2</sup>], B) Hull area [cm<sup>2</sup>], C) Perimeter [cm], D) Solidity, E) Dry weight [g], F) number of leaves, G) Number of tillers, H) Plant height [cm],  
 841 I) Leaf length [cm], J) Culm height [cm], K) Leaf angle [°], L) Tiller angle [°] and M) Droopiness [°]. Each data point represents the mean  
 842 out of 8 replicates for each of the 344 varieties. The colours represent different groups of subpopulations, ind – *indica*, aus, adm – *admixed*,  
 843 aro – *aromatic*, trj – *tropical japonica* and tej – *temperate japonica*. The letters in the graphs represent the significantly different groups, as  
 844 determined with Tukey's HSD with p-value < 0.05. Mean values for all 13 traits and the sum of the normalized traits including results for  
 845 Tukey's pairwise post hoc test can be found in Supplemental Table 2.

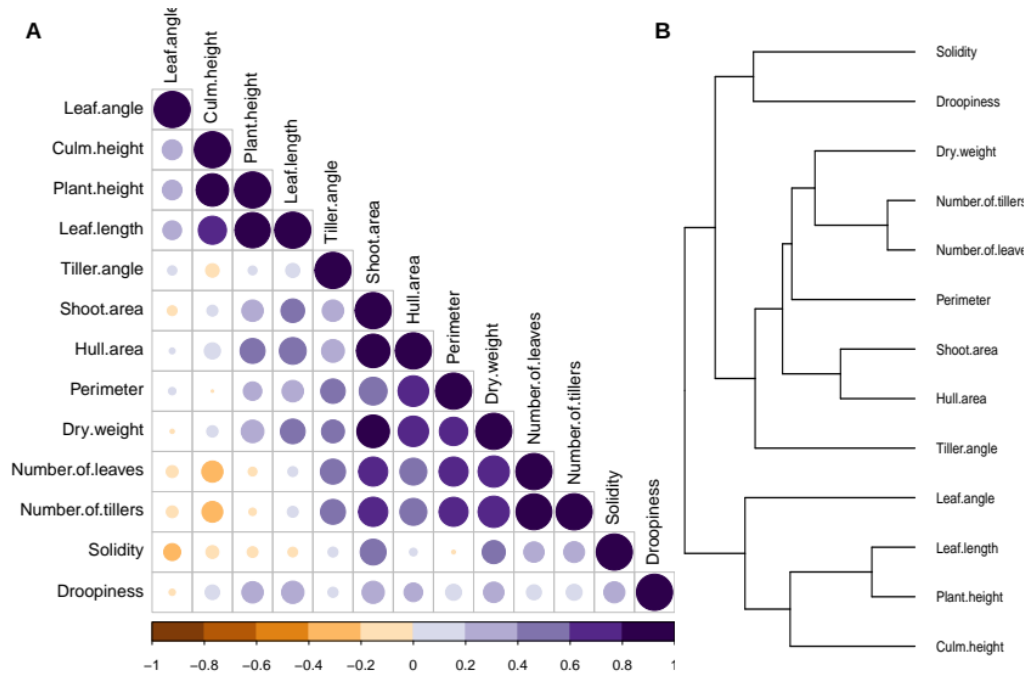

846

847 **Figure 2: Correlation and clustering of 13 shoot traits defines core groups of traits.** A) Pearson Correlation coefficients between  
 848 traits. The colour and size of the circles reflect the strength of the correlation. B) Hierarchical Cluster Analysis. Traits are clustered using  
 849 ward.D2 method. Rows represent 13 studied shoot traits. The values of individual samples are normalized per trait using z-Fisher  
 850 transformation scaled prior to clustering. Based on a cut off at seven clusters and together with the correlation coefficients, we grouped  
 851 together the traits into defined core groups.

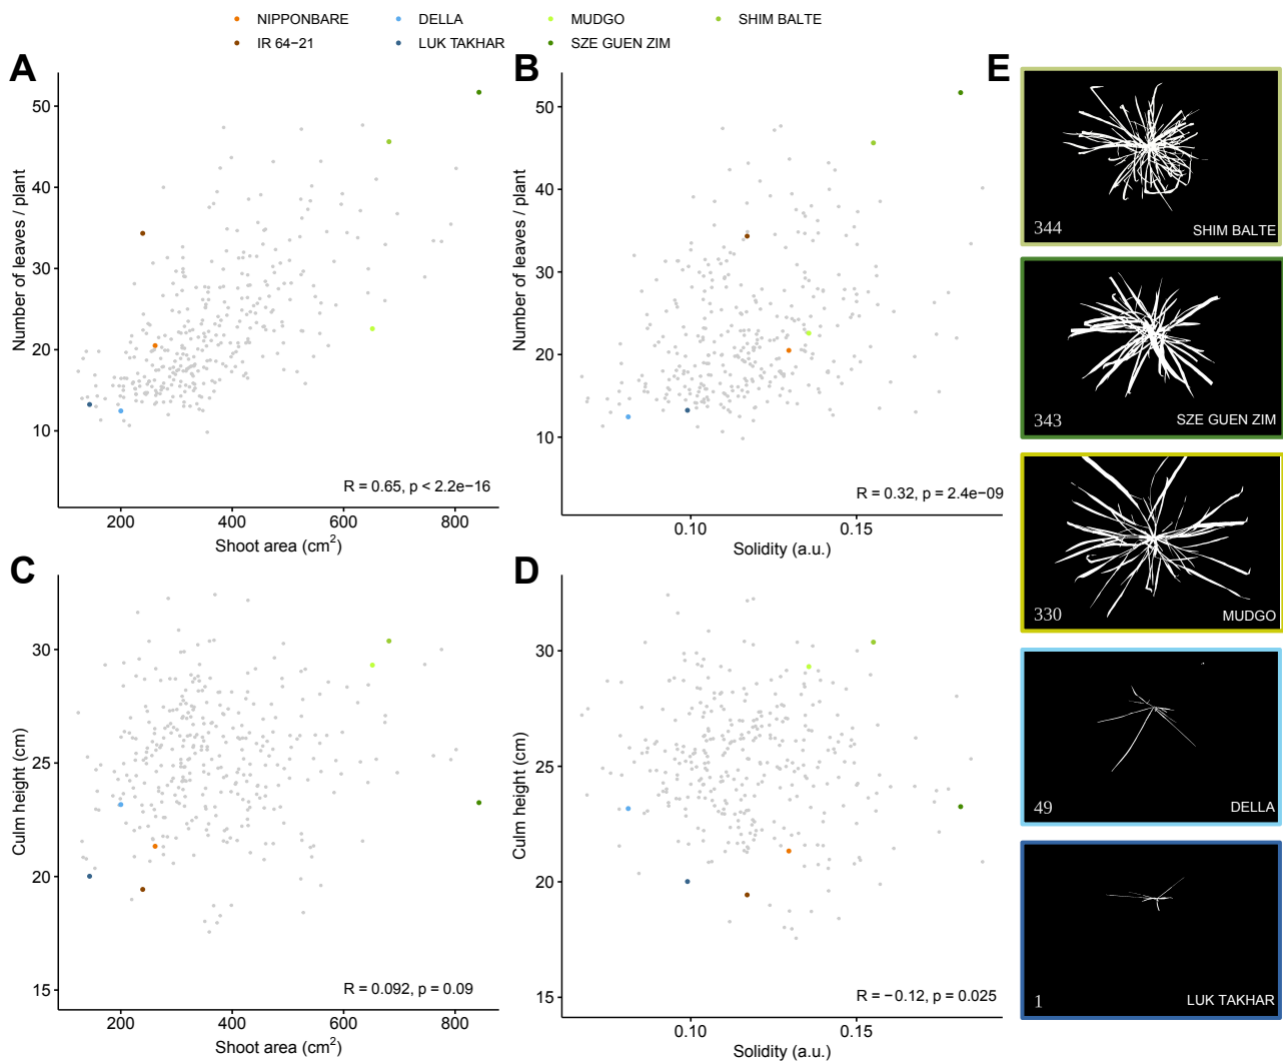

852

853 **Figure 3: Visualization of shading potential in the investigated rice diversity panel based on cor traits for the Shading Rank.** A) -  
 854 D) Scatter plots showing the distribution of 344 rice varieties in pair-wise combination of four core traits, shoot area, number of leaves,  
 855 solidity and culm height. Representative high (344, 343 and 330) and low (49 and 1) ranking varieties together with Nipponbare (73) and  
 856 IR 64-21 (74) are highlighted in colours. B) Top view images of representative varieties, with colour coded frames. Numbers are respective  
 857 Shading Ranks as found in Table 3.

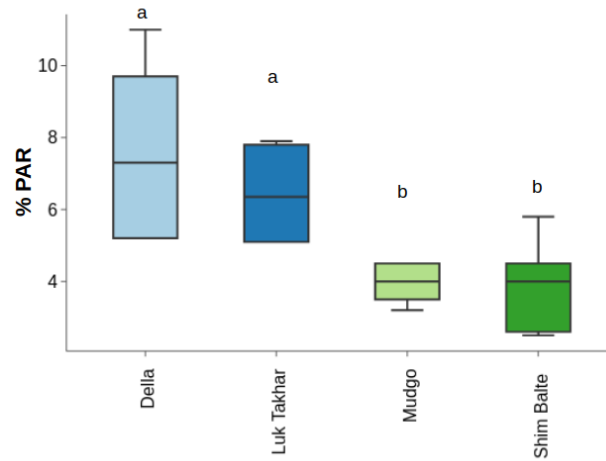

858 **Figure 4: Shading Rank predicts the canopy shading capacity of high and low ranking rice varieties.** Significant difference in  
859 shading capacity between canopies of different rice varieties at five weeks after sowing. The plot shows the reduction in light intensity (%  
860 PAR) measured at the ground level under the rice canopy compared to above the canopy, for different rice varieties on x-axis, where Della  
861 and Luk Takhar were classified as non-competitive (blue) with Shading ranks of 49 and 1, respectively and Mudgo and Shim Balte as  
862 competitive (green) with Shading Ranks of 330 and 344, respectively. Letters indicate significance (ANOVA with Tukey's pairwise  
863 comparison post hoc test  $p < 0.05$ ). Measured PAR values (photosynthetic active radiation of 400-700 nm waveband) can be found in  
864 Supplemental Table 4.



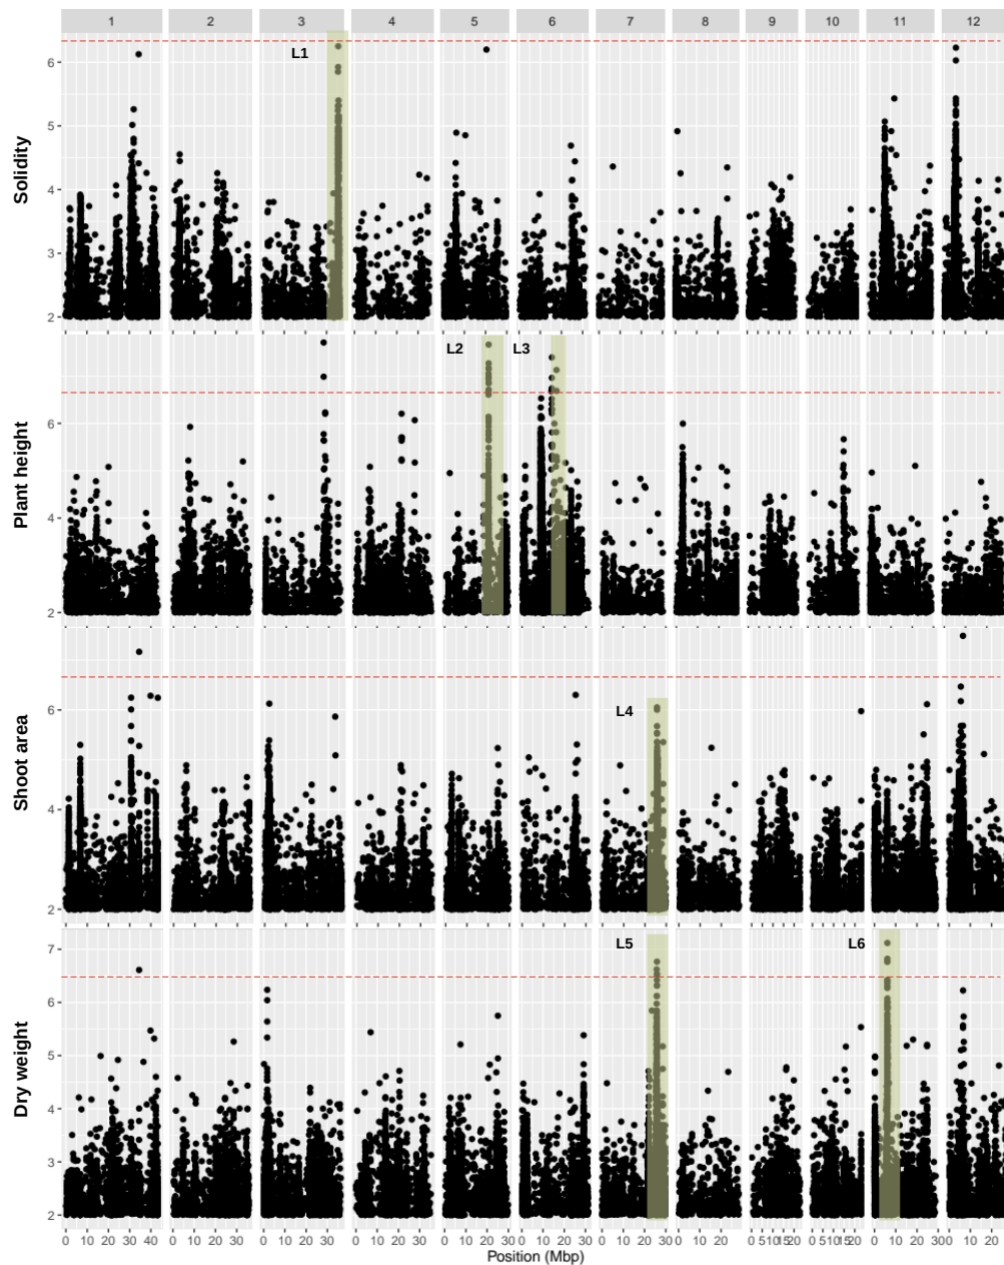

865

866 **Figure 5: GWAS identifies putative the genetic regions underlying shoot architectural traits and seedling vigour in 4-week-old rice**  
867 seedlings, reflecting the early vegetative growth stage. We used single-trait genome-wide association studies (GWAS) with a mixed linear  
868 model (MLM) for plant height, solidity, shoot area and dry weight. The Manhattan plots depict the single nucleotide polymorphisms (SNPs)  
869 with minor allele frequencies (MAF) > 0.05. Negative logarithmic p-values on the y-axis, for 1.7 M SNPs across the 12 rice chromosomes  
870 along the x-axis. Dashed red lines indicate significance threshold set at  $-\log_{10}(p\text{-value}) > 7.5$ . Genomic regions highlighted in green are  
871 loci of interest (numbered L1 – L6).

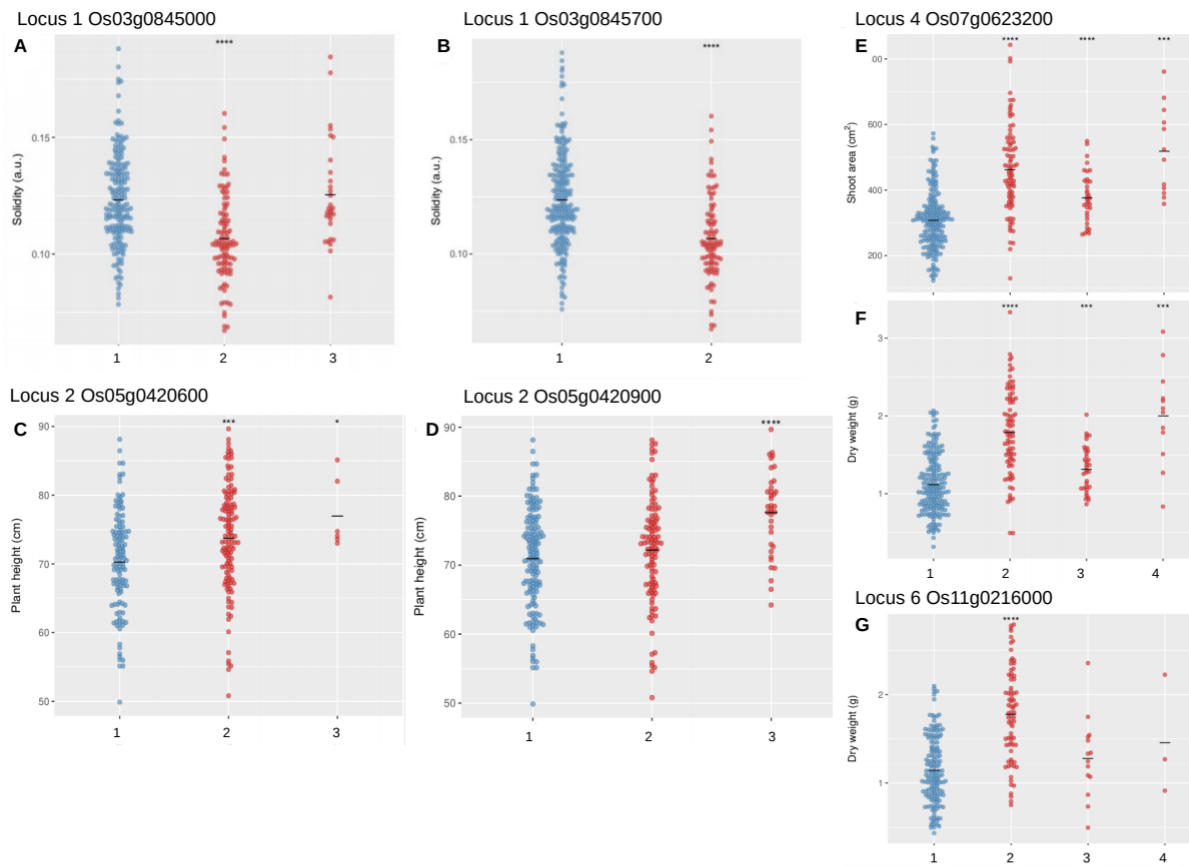

872

873 **Figure 6: Haplotypes for genes of interest associated with increased trait values.** Locus 1 was detected for solidity with haplotypes  
874 in the coding sequence of the genes A) Os03g0845000 consisting of two SNPs and B) Os03g0845700 consisting of one SNPs. Locus 2  
875 was detected for plant height with haplotypes in the coding sequence of the genes C) Os05g0420600 consisting of four SNPs and B)  
876 Os05g0420900 consisting of six SNPs. Locus 4 was detected for shoot area and dry weight with haplotypes in the coding sequence of  
877 the gene Os07g0623200 consisting of four SNPs shown for E) shoot area and F) dry weight. Locus 6 was detected for dry weight encoding  
878 only one gene G) Os11g0216000 with haplotypes consisting of nine SNPs. Dot plots for t-test, comparing each haplotype with the most  
879 abundant (blue) haplotype, on core traits for shading potential. Y-axis trait value, x-axis groups of haplotypes. Additional information about  
880 the detected genes can be found in Table 5 and dot plots for haplotypes for all 13 traits found in loci of interest are shown in Supplemental  
881 Figure 5.
